1 **Neural dynamics in the limbic system during male social**  
2 **behaviors**

3 Zhichao Guo<sup>1,2</sup>, Luping Yin<sup>1</sup>, Takuya Osakada<sup>1</sup>, Julieta Lischinsky<sup>1</sup>, Jonathan Chien<sup>3</sup>, Bing  
4 Dai<sup>1</sup>, Ashley Urtecho<sup>1</sup>, Xiaoyu Tong<sup>1</sup>, Zhe S. Chen<sup>1,3,4</sup>, Dayu Lin<sup>1,3,5</sup>

5

6 <sup>1</sup>Neuroscience Institute, New York University School of Medicine, New York, NY, USA

7 <sup>2</sup>School of Life Sciences, Peking University, Beijing, 100871, China

8 <sup>3</sup>Department of Psychiatry, Department of Neuroscience and Physiology, New York

9 University School of Medicine, New York, NY, USA; Center for Neural Science, New York

10 University, New York, NY, USA

11 <sup>4</sup>Department of Biomedical Engineering, NYU Tandon School of Engineering, Brooklyn,  
12 NY 11201, USA

13 <sup>5</sup>Correspondence: [Dayu.Lin@nyulangone.org](mailto:Dayu.Lin@nyulangone.org) (D.L.)

14

## 15 **Summary**

16 Sexual and aggressive behaviors are two evolutionarily conserved social behaviors vital  
17 for an animal's survival and reproductive success. While an increasing number of brain  
18 regions in the limbic system have been identified as functionally relevant for these two  
19 types of behaviors, an understanding of how social cues are represented across brain  
20 regions and how social behaviors are generated via this network activity remains elusive.  
21 To gain a holistic view of the neural responses during social behaviors, we utilized  
22 multi-fiber photometry to simultaneously record  $\text{Ca}^{2+}$  signals of estrogen receptor alpha  
23 (*Esr1*)-expressing cells from 13 limbic brain regions in male mice during sexual and  
24 aggressive behaviors and compare the response magnitude and temporal patterns across  
25 regions. We find that conspecific sensory information, as well as social action initiation  
26 signals, are widely distributed in the limbic system and can be decoded from the network  
27 activity. Cross-region correlation analysis reveals striking increases in functional  
28 connectivity in the network during the action initiation phase of social behaviors whereas  
29 advanced copulation is accompanied by a "dissociated" network state. Based on the  
30 response patterns, we propose a mating-biased network (MBN) and an  
31 aggression-biased network (ABN) for mediating male sexual and aggressive behaviors,  
32 respectively.

33

## 34 **Introduction**

35 Sexual and aggressive behaviors are two fundamental social behaviors. For males,  
36 sexual reproduction entails properly displaying copulative behaviors toward conspecific  
37 females, while the ability to deploy aggression to fend off conspecific male intruders is key  
38 to securing resources for mating success. These behaviors are innate, i.e., inborn, and  
39 thus, their generation should be supported by developmentally wired circuits. In 1999,  
40 Sarah Newman proposed the existence of a social behavior network (SBN) that mediates  
41 innate social behaviors in mammals based on decades of lesion and immediate early

42 gene mapping studies (Newman, 1999). The SBN includes seven interconnected  
43 subcortical areas: medial amygdala (MeA), bed nucleus of stria terminalis (BNST), medial  
44 preoptic area (MPOA), anterior hypothalamus (AHN), lateral septum (LS), ventromedial  
45 hypothalamus (VMH), and midbrain (including periaqueductal gray (PAG) and tegmentum)  
46 (Newman, 1999). MeA and BNST are collectively called the extended medial amygdala. In  
47 2005, James Goodson extended this network to non-mammalian vertebrate species  
48 based on studies in birds and teleost (bony) fish (Goodson, 2005). In recent years, the  
49 importance of SBN in social behaviors has been continuously validated and elaborated.  
50 For instance, gain- and loss-of-function studies demonstrated an indispensable role of the  
51 ventrolateral part of the ventromedial hypothalamic nucleus (VMHvl) in aggressive  
52 behaviors in mice (Falkner et al., 2016; Hashikawa et al., 2017; Lee et al., 2014; Lin et al.,  
53 2011; Yang et al., 2013; Yang et al., 2017), while the molecular identities of cells in the  
54 medial preoptic nucleus (MPN) relevant for sexual behaviors have been increasingly  
55 refined (Gao et al., 2019; Karigo et al., 2020; Michael et al., 2020; Wei et al., 2018).

56 A basic feature of the SBN is its enrichment of gonadal hormone receptors, which  
57 allow the cells to be modulated by gonadal steroid hormones, including androgens  
58 (testosterone), estrogens, and progesterone (Newman, 1999). Indeed, gonadal hormones  
59 are crucial for the emergence of social behaviors during development and their  
60 maintenance during adulthood in both males and females (Jennings and de Lecea, 2020;  
61 Wu and Shah, 2011). For example, female mice exposed to prenatal testosterone show  
62 male-like sexual and aggressive behaviors during adulthood (Edwards and Burge, 1971).  
63 Adult castration abolishes masculine behaviors, which can be restored by testosterone  
64 supplements (McCarthy, 2008). In males, testosterone mainly acts through estrogen  
65 receptors after being converted into estrogen via the enzyme aromatase (Wu and Shah,  
66 2011). Knocking out estrogen receptor alpha (*Esr1*) disrupts male sexual and aggressive  
67 behaviors severely (Ogawa et al., 2000; Ogawa et al., 1997; Wersinger et al., 1997). Thus,  
68 it is perhaps not a coincidence that *Esr1*-expressing cells in the MPN and VMHvl are  
69 found to be the relevant populations for sexual and aggressive behaviors (Hashikawa et  
70 al., 2017; Karigo et al., 2020; Lee et al., 2014; Wei et al., 2018).

71 The SBN does not cover all regions essential for social behaviors and requires an  
72 expansion. Several regions outside the SBN have recently been identified as necessary  
73 for male sexual or aggressive behaviors, or both. Posterior amygdala (PA) cells promote  
74 aggression and sexual behaviors through projections to VMHvl and MPN, respectively  
75 (Stagkourakis et al., 2020; Yamaguchi et al., 2020; Zha et al., 2020). The ventral part of  
76 the preammillary nucleus (PMv), a hypothalamic nucleus posterior to the VMHvl,  
77 projects heavily to both MPN and VMHvl and is important for male aggression (Chen et al.,  
78 2020; Soden et al., 2016; Stagkourakis et al., 2018). The ventral subiculum has also been  
79 found to bi-directionally modulate aggression at least partly through its projection to  
80 VMHvl (Chang and Gean, 2019). Interestingly, these newly identified social  
81 behavior-relevant regions share the same features of the original SBN: high levels of sex  
82 hormone receptor expression and extensive connections with regions in the SBN  
83 (Canteras et al., 1992a, b; Mitra et al., 2003; Yamaguchi et al., 2020).

84 Every behavior is a phenotypical manifestation of some well-orchestrated network  
85 activity. As our knowledge of the functions of individual brain regions and connections in  
86 social behaviors accumulates, an important next step is to holistically understand the  
87 behavior-relevant neural activity in a large network of interacting regions. Indeed, several  
88 recent studies have attempted to achieve this goal in other behavioral contexts using  
89 large-scale single-unit recording with multi-site silicon probes, e.g., Neuropixels (Allen et  
90 al., 2019; Juavinett et al., 2019; Jun et al., 2017; Siegel et al., 2015; Steinmetz et al.,  
91 2019). However, recording sites of silicon probes are generally distributed along the  
92 vertical shafts, making them unsuitable for simultaneous recording from multiple deep  
93 subcortical regions. As an alternative approach, fiber photometry, a method first  
94 developed to record bulk fluorescence signals from subcortical regions (Cui et al., 2013;  
95 Gunaydin et al., 2014), has also been scaled up to enable recording from multiple regions  
96 (Guo et al., 2015; Kim et al., 2016). Here, the lack of cellular resolution is offset by the  
97 ability to record from molecularly-defined subpopulations, or in other words, cells with  
98 potentially similar functions and relatively homogeneous responses (Lin and Schnitzer,  
99 2016). The recent incorporation of high-density customizable multi-fiber arrays

100 dramatically reduces the total weight of the implant and associated brain damage, making  
101 it well-suited for recording multiple sites in the SBN and beyond in freely moving animals  
102 (Sych et al., 2019).

103 Leveraging this multi-fiber photometry (MFP) technique, we simultaneously recorded  
104 the  $\text{Ca}^{2+}$  activities of *Esr1*<sup>+</sup> populations from 13 regions in the limbic system, referred to  
105 here as the expanded SBN, during sexual and aggressive behaviors in freely-moving  
106 male mice. Our results reveal dynamic neural representations of these two types of  
107 behaviors at the network level.

108

## 109 **Results**

### 110 **Simultaneous recording from 13 brain regions in the extended social behavior** 111 **network**

112 We selected 13 brain regions that have either been implicated in aggressive and/or sexual  
113 behaviors or are strongly connected with those regions for  $\text{Ca}^{2+}$  recording during social  
114 behaviors. The list includes five hypothalamic regions – medial preoptic nucleus (MPN),  
115 anterior hypothalamic nucleus (AHN), ventrolateral part of the ventromedial hypothalamus  
116 (VMHvl), dorsomedial hypothalamus (DMH) and ventral premammillary nucleus (PMv),  
117 five amygdala regions – anterior medial amygdala (MeAa), posterodorsal medial amygdala  
118 (MeApd), posterior amygdala (PA), posteromedial cortical amygdala (CoApm) and  
119 posteromedial bed nucleus of stria terminalis (BNSTpm), and three regions outside of  
120 amygdala and hypothalamus – ventral part of lateral septum (LSv), ventral subiculum  
121 (SUBv) and lateral periaqueductal gray (IPAG) (**Figure 1A**) (Bayless et al., 2019; Chang  
122 and Gean, 2019; Chen et al., 2020; Falkner et al., 2020; Hong et al., 2014; Karigo et al.,  
123 2020; Lee et al., 2014; Lenschow and Lima, 2020; Leroy et al., 2018; Lin et al., 2011;  
124 Lischinsky and Lin, 2020; Newman, 1999; Stagkourakis et al., 2020; Stagkourakis et al.,  
125 2018; Unger et al., 2015; Wei et al., 2018; Wong et al., 2016; Xie et al., 2020; Yamaguchi  
126 et al., 2020; Yang et al., 2013; Yang et al., 2017; Zelikowsky et al., 2018; Zha et al., 2020;  
127 Zhu et al., 2020). Each of these 13 regions is densely connected with multiple other

128 recorded regions and expresses abundant *Esr1*, with the exceptions of AHN, LSv, and  
129 PAG, where *Esr1* expression is modest. To target *Esr1*-expressing cells in these regions,  
130 we injected Cre-dependent GCaMP6f viruses into each candidate region in *Esr1*-2A-Cre  
131 male mice (**Figures S1 and S2**). During the same surgery, two custom arrays, each  
132 composed of multiple 100- $\mu$ m optic fibers, with one targeting seven medially located  
133 regions and the other targeting five laterally positioned regions, and a single fiber targeting  
134 IPAG were implanted (**Figures 1B**). The recording setup is a modified version of  
135 previously reported setups (Kim et al., 2016; Sych et al., 2019). It uses a low-cost CCD  
136 camera to capture images from the end of a 19-channel fiber bundle (only 13 channels  
137 were used here) that delivers and collects, respectively, the excitation and emission light  
138 from each recording site (**Figures 1C, D, E**).

139           Recordings started three weeks after the surgery, each comprised of a male, a  
140 female, and sometimes an object session (**Figure 1F**). During the male session, a  
141 group-housed non-aggressive Balb/C male was introduced into the home cage of the  
142 recording male for approximately 10 minutes, while a receptive female was introduced  
143 during the female session. We observed peak fluorescence changes ( $\Delta F/F$ ) over 100%,  
144 comparable to the *Esr1* cell responses recorded using a conventional single-fiber  
145 photometric recording setup (Bayless et al., 2019; Chen et al., 2020; Falkner et al., 2016;  
146 Falkner et al., 2020; Wang et al., 2019; Wei et al., 2018; Yamaguchi et al., 2020) (**Figure**  
147 **1G**). We performed the recording two to four times for each animal, with 3-7 days between  
148 recording sessions. Histological analysis was performed for all animals, and only correctly  
149 targeted brain regions were used for a given animal. The final dataset contains 64  
150 recording sessions from 25 animals (mean  $\pm$  STD =  $2.6 \pm 1.0$  sessions/animal), with  $10.6$   
151  $\pm 2.2$  (mean  $\pm$  STD) recording sites/animal.

152

### 153 **Large activity increase across the expanded SBN during the initial encounter** 154 **with a conspecific**

155 Upon entry of an intruder, regardless of sex, many brain regions in the male mice showed

156 remarkable increases in  $\text{Ca}^{2+}$  activity (**Figures 2A-F**). During the male introduction,  
157 VMHvl showed the largest activity increase among all recorded regions, followed by DMH  
158 and PMv (**Figure 2A, E, G, and H**). During the female introduction, MPN showed the  
159 largest increase, with VMHvl, DMH, PMv, MeAa, BNSTp, MeAp, and PA all showing a  
160 similarly large increase (**Figure 2I, J**). Outside the hypothalamus and amygdala, SUBv  
161 and Lsv also increased activity moderately, whereas the activity increase in the IPAG was  
162 minor and only significant during the male introduction (**Figure 2G-J**). When comparing  
163 the entry response towards males and females, VMHvl, DMH, and PMv showed a  
164 preferential response towards males over females, whereas MPN, BNSTp, MeAa, and PA  
165 showed the opposite response bias, suggesting their potentially preferential involvement  
166 in male- or female-directed social behaviors (**Figure 2S**).

167       The temporal dynamics of the responses differed across regions but, interestingly,  
168 were similar during male and female entries (**Figure 2K-R**). In general, hypothalamic  
169 regions increased activity more rapidly during intruder entry than extra-hypothalamic  
170 regions (**Figure 2K-N**). During both male and female introduction, DMH rose with the  
171 shortest latency ( $< 1\text{s}$ ), significantly faster than most other regions (**Figure 2K-N**). PMv  
172 showed the slowest activity increase among all the hypothalamic regions with a median  
173 latency of approximately 3 s (**Figure 2K-N**). Amygdala areas generally took longer to  
174 respond to the intruder than hypothalamic areas. MeAa and PA responded in  
175 approximately 2-3 s while MeAp took around 4 s to respond after the intruder introduction  
176 (**Figure 2K-N**). CoApm responded the most slowly during intruder introduction, with a  
177 median response latency over 6 s (**Figure 2K, M**). The activity increase of hypothalamic  
178 regions also peaked more rapidly, with average latencies of approximately 5 s, while the  
179 responses of amygdala regions took 7-23 s to peak (**Figure 2O-R**). Among the  
180 extra-hypothalamic regions, MeAa consistently demonstrated the shortest peak time,  
181 faster than MeAp and CoApm. Notably, there was no difference in onset latency or time to  
182 peak between male and female intruder introduction, suggesting that, unlike the  
183 magnitude of the response, the temporal dynamics of a region's response are largely  
184 independent of the intruder sex (**Figure 2T, U**). Given that the hypothalamic responses

185 during intruder entry are larger and faster than amygdala responses, it is unlikely that the  
186 hypothalamic responses result from amygdala inputs, at least initially, despite the fact that  
187 all recorded amygdala regions, except CoApm, project directly and densely to the  
188 recorded hypothalamic regions (Canteras et al., 1992a, 1995; Dong and Swanson, 2004)

189 During the introduction of a novel object, AHN, VMHvl, and DMH increased activity  
190 slightly but significantly, suggesting that activities in these regions could also be  
191 influenced by arousal or novelty (**Figure S3A and B**). However, compared to the  
192 conspecific introduction, the response magnitude during object introduction was  
193 significantly smaller (**Figure S3C-E**).

194

### 195 **The magnitude but not the sequence of responses differs between male and** 196 **female investigation**

197 After the initial large  $\text{Ca}^{2+}$  increase upon intruder introduction, Esr1 cells in all regions in  
198 the hypothalamus and amygdala, except AHN, increased activity during investigating  
199 males and females (**Figure 3A-K, S4**). During the male investigation, VMHvl showed the  
200 largest activity increase, followed by PMv, DMH, and MeAp (**Figure 3C-H**). During the  
201 female investigation, MPN, PA and MeAa showed the greatest activity increase, followed  
202 by MeAp, BNSTp, VMHvl, and PMv (**Figure 3I-J**). Outside the hypothalamus and  
203 amygdala, SUBv showed a slight increase in activity, while IPAG and LSv showed no  
204 activity change during either male or female investigation (**Figure 3G, I**). We calculated  
205 the difference in response magnitude (Z score) during male and female investigation for  
206 each recording session and found that VMHvl, DMH, and PMv ( $p = 0.06$ ) showed  
207 male-biased responses, whereas MPN, PA, and MeAa showed female-biased responses  
208 (**Figure 3K**). Although investigating males and females evoked activity increase in the  
209 same ten regions, there was no significant correlation between the response magnitude to  
210 males and females across regions, suggesting that male and female cues evoked distinct  
211 activation patterns in the social network (**Figure 3L**). No activity change existed in any  
212 brain region during novel object investigation, suggesting the response is social-specific  
213 (**Figure S3F, G**).



214 The temporal response patterns during male and female investigation differed across  
215 regions but were largely sex-independent (**Figure 3M-S**). We focused our analysis on the  
216 subset of regions that showed a significant increase during the male or female  
217 investigation and compared the response onsets of two simultaneously recorded regions  
218 during trials when they both increased their activity significantly ( $Z > 2$ ) (**Figure 3M-S**).  
219 Unlike the response during intruder entry, MeAa, instead of DMH, was the fastest  
220 responding region during both male and female investigation (**Figure 3M-S**). In fact,  
221 MeAa was the only region that started to rise slightly before the onset of close  
222 investigation, suggesting that its activity change likely does not require direct physical  
223 contact (**Figure 3N, Q**). MeAa responded significantly earlier than MPN ( $p = 0.08$  for male  
224 investigation), VMHvl, and PMv, making it a possible driving force for hypothalamic  
225 activation (**Figure 3O, R**). During both male and female investigations, PMv represents  
226 one of the slowest regions to respond, although its activity increase was one of the highest,  
227 especially during male investigation (**Figure 3G, N, O, Q and R**). Indeed, the fastest  
228 responsive region, MeAa, showed only a modest increase in activity during investigating  
229 males, suggesting that the response onset and magnitude are largely independent  
230 variables (**Figure 3G**). When comparing the response onset during the male and female  
231 investigation, only MeAp showed a slightly faster response during male investigation  
232 (**Figure 3S**). Thus, the temporal sequence of the responses during social investigation in  
233 the expanded SBN is largely invariant to the intruder's sex and is likely a stable network  
234 property.

235

### 236 **Distinct response patterns during attack and sexual behaviors**

237 After a period of investigation, animals expressed distinct actions towards male and  
238 female intruders. Specifically, they attacked male intruders and mounted female intruders.  
239 Mount refers to the process in which a male tries to grasp the female's flank with its front  
240 paws and establishes an on-top position. Although both attack and mount involve quick  
241 movements towards the intruder, the activity pattern in the expanded SBN is highly distinct  
242 (**Figure 4, S4**). During attack, the activity increase is widespread, with LSV as the only

243 exception (**Figure 4A, C**). The lack of activity increase in LSv is interesting, given its role  
244 in suppressing aggression (Leroy et al., 2018; Wong et al., 2016). VMHvl, DMH, and IPAG  
245 were the regions with the highest activity increase, while the remaining responsive regions  
246 showed a similarly moderate activity increase (**Figure 4A, C, and D**). It is worth noting  
247 that IPAG and AHN only increased activity during attack but not male investigation,  
248 suggesting their action-specific responses (**Figure 3G and 4C**). In comparison, the  
249 activity increase during mounting was more limited and graded. MPN and MeAa showed  
250 the highest activity increase, followed by DMH, PA, BNSTp, VMHvl, and AHN (**Figure 4E,**  
251 **F**). The remaining six regions did not show consistent activity increase (**Figure 4E, F**).  
252 The activity change during attack and mounting was not significantly correlated,  
253 suggesting that the activation pattern is behavior-specific (**Figure 4K**).

254 The temporal dynamics of the responses during attack and mount were also distinct  
255 (**Figure 4L-Q**). During attack, VMHvl responded the most quickly, increasing activity  
256 significantly earlier than MeAa, PA, PMv, and IPAG (**Figure 4L-N**). IPAG was the only  
257 region that increased activity after the onset of attack, consistent with its main role in  
258 driving biting during attack (**Figure 4M**) (Falkner et al., 2020). But overall, there was  
259 relatively little temporal difference in the response onset among the 12 regions that  
260 significantly increased activity during attack, suggesting that attack initiation may involve  
261 simultaneous activation of many regions in the limbic system (**Figure 4N**).

262 The activity increase in the hypothalamus and amygdala often preceded the mount  
263 onset, possibly partly because mount often follows close interaction with the female  
264 (**Figure 4O-P**). Across regions, MeAa responded with the shortest latency, significantly  
265 earlier than MPN and PA, while MPN and PA increased activity earlier than BNSTp  
266 (**Figure 4P-Q**). Thus, mount appears to involve sequential recruitment of regions in the  
267 expanded SBN.

268 After the male establishes an on-top position, it rapidly (22-25 Hz) and shallowly  
269 thrusts with its pelvis (Morali et al., 2003). If the male detects the female's vagina, mount  
270 advances to intromission, or deep thrust, a motion that enables the male to insert its penis  
271 into the female's vagina (Morali et al., 2003). After multiple intromissions, typically 5-20

272 times, the male ejaculates, characterized by ceased movement and a slow dismount (Hull  
273 and Dominguez, 2007). As male sexual behavior advanced, the activities of different  
274 regions diverged (**Figure 4G-J, S4**). MPN, BNSTp, and PA gradually increased activity  
275 from shallow thrust to ejaculation (**Figure 4G-J, S4**). The activity increase in BNSTp  
276 during ejaculation was particularly striking, reaching a peak value 3-4 times higher than  
277 during any other period (**Figure 4I, S4**). In contrast, most other regions gradually  
278 decreased activity as the animals advanced from mount to deep thrust (**Figure 4G-J, S4**).  
279 Towards the end of the deep thrust, there was a widespread suppression of activity in the  
280 expanded SBN except for MPN, BNSTp, and PA (**Figure 4H-J, S4**). During ejaculation,  
281 some suppressed regions, including VMHvl, MeAa and CoApm and IPAG, showed a slight  
282 increase in activity while others, such as SUBv, AHN and DMH, were further suppressed  
283 (**Figure 4J, S4**). Altogether, these results revealed distinct activation patterns during male  
284 aggression and sexual behaviors: the former is characterized by a widespread and  
285 simultaneous activation across many regions, while the latter features robust activation of  
286 a small set of regions and a gradual suppression of many others.

287

#### 288 **Delineation of the aggression-biased network and the mating-biased network**

289 We then performed the principal component analysis (PCA) based on the mean  
290 responses (Z score) of all regions during various phases of social behaviors (**Figure 5A**).  
291 The variance in responses across behaviors could be explained nearly fully (99%) by the  
292 first four principal components (PCs) (**Figure 5B**). PC1 is composed of responses during  
293 male sexual behaviors, especially ejaculation and deep thrust. MPN and BNSTp have the  
294 highest PC1 score, followed by PA and MeAa, while all other regions have negative PC1  
295 scores, consistent with their suppressed activity during advanced sexual behaviors  
296 (**Figure 5C, D**). PC2 is dominated by responses during male-directed behaviors,  
297 especially male investigation, and VMHvl is the region with the highest score, followed by  
298 DMH, PMv, and MeAp (**Figure 5C, D**). PC3 is again composed of female-directed  
299 behavior, but unlike PC1, mount and shallow thrust have the highest loadings, while

300 ejaculation has a negative loading (**Figure 5C**). MeAa and MPN are the regions with the  
301 highest PC3 scores, followed by PA, consistent with their activity increase during mount  
302 (**Figure 5D**). Finally, PC4 features a high loading during attack and negative loadings  
303 during investigation (**Figure 5C**). IPAG shows the highest PC4 score, followed by DMH,  
304 VMHvl, and AHN (**Figure 5D**).

305 Based on this analysis, we propose an aggression-biased network (ABN) and a  
306 mating-biased network (MBN) among our recorded regions (**Figure 5H**). ABN contains six  
307 brain regions, including VMHvl, PMv, MeAp, DMH, AHN, and IPAG. AHN and IPAG are  
308 preferentially activated during attack and thus represent the motor output nodes of ABN.  
309 On the other hand, MBN contains four regions, including MPN, BNSTpm, PA, and MeAa.  
310 MeAa is mainly activated during the early phase, while BNSTp increases activity  
311 preferentially during the late phase of copulation, while MPN and PA are activated  
312 throughout sexual behaviors.

313 To further understand the distinctiveness of the activation pattern during each  
314 behavior and the contribution of ABN and MBN activity to predict the behavior, we trained  
315 a discriminant analysis model for each recording session using 80% of randomly selected  
316 data points (training set). Then we predicted the behavior categories of the remaining 20%  
317 of data points (testing set). When the model was trained and tested using only frames that  
318 were annotated with a specific behavior (16% of total frames across all videos), it  
319 successfully separated the behaviors based on the neural activation patterns and  
320 predicted most behaviors accurately (F1 score (mean across behaviors  $\pm$  STD) =  $0.81 \pm$   
321  $0.11$ ) (**Figure S5**). Mount and shallow thrust have relatively low F1 scores as they are  
322 sometimes misclassified as each other, possibly due to their close temporal proximity and  
323 the difficulty for humans to determine the precise transition point (**Figure S5B, C**).

324 We next trained and tested the model using all frames, including frames without  
325 specific social behaviors (annotated as "other") (**Figure 5E-G**). These "other" frames  
326 mainly involve two animals being far apart but also contain instances when animals were  
327 close but showed no discrete actions. After including these unspecified frames, we found  
328 that F1 scores (mean  $\pm$  STD =  $0.49 \pm 0.22$ ) were decreased for all social behavior

329 categories, although the all-frame model was able to predict all behaviors significantly  
330 better than models trained with shuffled recording data (**Figure 5E, F and S5C**). The  
331 decrease in F1 score was mainly driven by misclassifying "other" frames as ones with  
332 specific behaviors and *vice versa* (**Figure 5E**). Interestingly, the drop in the F1 score  
333 varied widely across behaviors. For deep thrust and ejaculation, F1 scores only dropped  
334 slightly (<15%), while the F1 score for mount dropped by nearly 70% (**Figures 5F and**  
335 **S5C**). This result suggests that neural activation patterns associated with deep thrust and  
336 ejaculation are highly distinct and rarely occur outside of these behaviors during social  
337 interaction. In contrast, the activity pattern associated with mount is much less so,  
338 possibly reflecting many intended mounts that are not manifested behaviorally.

339 We then investigated the contribution of ABN and MBN activity in predicting the  
340 behaviors by training models using only data from non-MBN regions or non-ABN regions.  
341 When using the non-MBN model, F1 scores for all female-directed behaviors, but not  
342 male-directed behaviors, dropped dramatically compared to the full model trained using  
343 data from all regions, supporting a key role of MBN activity in determining the behavior  
344 output towards the females (**Figure 5F, G**). When using the non-ABN model, F1 scores for  
345 male-directed behaviors dropped the most, but notably, F1 scores for mount and shallow  
346 thrust also decreased, suggesting that mount initiating could require activity in both MBN  
347 and ABN (**Figure 5F, G**). It is worth noting that the activity of non-MBN and non-ABN  
348 regions could still predict male- and female-directed behaviors better than shuffled  
349 controls, suggesting that although ABN and MBN are preferentially involved in aggression  
350 and mating, respectively, they are not exclusive for the behavior (**Figure 5F**).

351

### 352 **Strengthened functional connectivity in the expanded SBN during the initiation** 353 **of social behaviors**

354 To address whether the functional connectivity among regions in the expanded SBN  
355 changes with social behaviors, we next calculated the coefficient of determination ( $R^2$ )  
356 using 1-s moving windows (25 data points) between each pair of simultaneously recorded  
357 regions (**Figure 6A**). The time window was chosen based on the typical duration of a

358 behavior episode (approximately 1-15s, see **Figure 3A-F and 4A-B**). Varying time  
359 windows from 0.4 s to 2 s did not change the result qualitatively. To remove the  
360 auto-correlation between adjacent data points, we pre-processed the data by calculating  
361 the 1<sup>st</sup> order derivative of each recording trace as the difference between adjacent data  
362 points (**Figure S6**). Figure 6 shows the correlation between PMv and VMHvl as an  
363 example. For the representative recording session, PMv-VMHvl had  $R^2$  of approximately  
364 0.09 at the baseline before intruder introduction (**Figure 6B, D**). In the presence of a male  
365 intruder, the  $R^2$  jumped to approximately 0.15, further increased to 0.25 during male  
366 investigation, and peaked at around 0.44 during attack (**Figure 6B-D**). PMv-VMHvl  
367 correlation also increased in the presence of a female intruder and was further elevated  
368 during female investigation (**Figure 6D**). However, the correlation gradually decreased as  
369 the sexual behaviors advanced and reached a level below the pre-intruder baseline during  
370 deep thrust and ejaculation (**Figure 6C, D**). These changes are consistent across  
371 recording sessions from different animals: the functional connectivity, i.e.,  $R^2$ , between  
372 PMv and VMHvl strengthened during male-male interaction and peaked during attack,  
373 whereas it gradually decreased during sexual behaviors (**Figure 6E-M**).

374 One crucial question is whether the correlation change during social behavior simply  
375 reflects changes in motor output. To understand the relationship between functional  
376 connectivity and movement, we calculated  $R^2$  for all pairs during the low (bottom 25%)  
377 and high-velocity (top 25%) periods when the animal was alone in the cage. Although no  
378 pair of regions showed a significant change in  $R^2$  with velocity, we noticed that  
379 connections involving IPAG, SUBv, BNSTpm, PA, and LSv tended to increase strength  
380 during the high-velocity period (**Figure S7A-C**). To further address the question, we  
381 identified the time points when the locomotion initiated (reach peak speed  $>8$  pixel/fr) after  
382 a quiescence period (mean speed  $< 1$  pixel/fr for  $> 1$ s) and constructed PSTHs of  $R^2$   
383 aligned to the movement onset (**Figure S7D, E**). This analysis confirmed that functional  
384 connectivity between regions involving IPAG, SUBv, BNSTpm, PA, and LSv increased  
385 after movement initiation. However, functional connections among hypothalamic regions,  
386 medial amygdala, and cortical amygdala were largely invariant to movement (**Figure S7F**

387 **and G**). Thus, although movement may contribute to changes in functional connectivity  
388 between some regions, it is not expected to play a significant role in modulating the  
389 functional connectivity among the hypothalamus, medial and cortical amygdala, e.g.,  
390 between VMHvl and PMv, during social behaviors.

391 We then examined the functional connectivity across all 78 pairs of regions during  
392 different social behaviors and reached several general conclusions. First, some regions  
393 showed a significant correlation in activity even at the baseline level (**Figure 7A and B**).  
394 This baseline correlation may be considered resting-state connectivity. The strongest  
395 functional connectivity was observed among amygdala regions, including MeApd, PA,  
396 CoApm and SUBv, or connections involving IPAG (**Figure 7A and B**). After male and  
397 female introduction but in the absence of social interaction, the functional connectivity  
398 pattern remained largely the same except for strengthening of the VMHvl and PMv  
399 connection, especially in the presence of a male intruder (**Figure 7A, C and F**). During the  
400 social investigation with males, the correlation among VMHvl, PMv, and DMH, increased  
401 significantly (**Figure 7A, D**). During the female investigation, there is a broader, weak  
402 increase in functional connectivity (**Figure 7A, G**). The most striking changes in  
403 correlation occur during attack and mount, the social behavior initiation phase. During  
404 attack, the functional connectivity between 95% of pairs in the social network increased  
405 significantly and drastically (**Figure 7A, E, and L-N**). Intriguingly, the increase in functional  
406 connectivity does not necessarily require a net change in  $Ca^{2+}$  activity. For example,  
407 although LSv did not show an increase in response during attack, its functional  
408 connectivity with the rest of the expanded SBN nevertheless increased (**Figure 7A, L**).  
409 During mounting, there is also an overall increase in connectivity in the network, but  
410 interestingly not for connections involving the VMHvl (**Figure 7A, H and L-N**). As the  
411 sexual behavior advanced, we observed a general decorrelation in the network (**Figure**  
412 **7A, I-N**). During shallow thrust, the connectivity largely returned to the baseline level  
413 except for several weakly strengthened connections involving BNSTpm, MPN, PA, IPAG,  
414 and AHN (**Figure 7A, I, L**). During deep thrust and ejaculation, most connections  
415 weakened, some reaching a level significantly below the pre-intruder baseline (**Figure 7A,**

416 **I-N).**

417 Introducing a small jitter (40-200 ms) into the simultaneously recorded  $\text{Ca}^{2+}$  traces  
418 abolished the across-region correlation during all behaviors, suggesting that the  
419 correlation is highly sensitive to the precise alignment of activities between regions  
420 (**Figure S8**). Altogether, these results suggest that initiating social actions involves  
421 coordinated activation across the social network, including regions that appear to show no  
422 net change in activity. Intriguingly, advanced sexual behaviors are accompanied by a  
423 "dissociated" brain state.

424

425

## 426 **Discussion**

427 Mating and fighting are two complicated behaviors supported by the coordinated activation  
428 of many brain regions. Here, using a modified multi-site optical recording system, we  
429 examined the neural activities across multiple regions in the limbic system during sexual  
430 and aggressive behaviors in male mice. These recordings revealed widespread activities  
431 in the network that evolved in distinct ways over the course of male-male and male-female  
432 social interactions.

433

### 434 **The overall activation pattern in the expanded SBN during male social** 435 **behaviors**

436 Here, we characterized three aspects of the  $\text{Ca}^{2+}$  responses during social behaviors:  
437 magnitude, timing, and functional connectivity among regions (**Figure S9**). Overall, the  
438 response magnitude was behavior- and intruder sex-specific, whereas the timing was  
439 behavior- but not intruder sex-specific. Functional connectivity in the network increases  
440 drastically during the fast action phase of social behaviors, i.e., attack and mount, and  
441 decreases as the males engage in advanced copulation.

442 The most prominent responses of most recorded regions occurred when the animal  
443 first encountered the intruder. This is perhaps not surprising as the net change of sensory



444 cues was the largest at that moment. An unexpected finding is that the entry response was  
445 generally higher and faster in the hypothalamus than amygdala, possibly reflecting a  
446 higher level of information convergence and a lower spontaneous activity in the  
447 hypothalamus. DMH was consistently the first (<1s) to respond regardless of the intruder  
448 sex, and this response occurred before the physical interaction of the two animals (median  
449 latency of first interaction: 3.7 s for a male intruder and 3.6 s for a female intruder),  
450 suggesting its potential role in the initial detection of distant social targets. Several regions  
451 in the ABN, such as VMHvl, DMH, and PMv, showed higher responses to males than  
452 females, while all MBN regions, including MeAa, PA, BNSTpm, and MPN, showed the  
453 opposite preference. Thus, information regarding the sex identity of the intruder is  
454 represented widely in the expanded SBN quickly after the intruder's presence.

455       Ten out of thirteen regions were activated significantly during social investigation, all  
456 responding to both males and females. The response magnitude in each region showed a  
457 sex bias similar to that during initial intruder encounters. Interestingly, MeAa instead of  
458 DMH was the first region to increase its activity during each episode of social investigation,  
459 and it was also the only region to respond before the investigation onset. Like MeAp, MeAa  
460 receives extensive inputs from the accessory olfactory bulb and projects densely to the  
461 medial hypothalamus and other olfactory-related amygdala regions (Pardo-Bellver et al.,  
462 2012). However, it has received much less attention regarding its functions in social  
463 behaviors, as immediate early gene studies found that MeAa activation is not social  
464 behavior-specific. Handling, tail pinch, mating, and fighting activate the area similarly  
465 (Kollack-Walker and Newman, 1995), leading to the hypothesis that MeAa belongs to a  
466 general arousal circuit (Newman et al., 1997). Here, we found the MeA<sup>Esr1</sup> cells were  
467 rapidly and specifically activated during social investigation, especially towards females,  
468 but not object investigation, suggesting a potential social-specific role. Interestingly, in  
469 comparison to MeAp, MeAa projects more densely to the ventral striatum and ventral  
470 tegmental area, regions essential for moment-to-moment social interest (Dai et al., 2022;  
471 Gunaydin et al., 2014; Pardo-Bellver et al., 2012).

472       The activity change during attack and mount differed vastly. Attack was accompanied

473 by activity increases in all regions except the LSV, a region that has been found to suppress  
474 aggression. VMHvl demonstrated the fastest and largest response during attack. In  
475 particular, its activity increase preceded PA, PMv, and PAG, regions that have been shown  
476 to play roles in aggression, suggesting that VMHvl may be the "ignitor" of attack (Chen et  
477 al., 2020; Falkner et al., 2020; Stagkourakis et al., 2020; Stagkourakis et al., 2018;  
478 Yamaguchi et al., 2020; Zha et al., 2020). However, VMHvl does not mediate attacks on its  
479 own. The functional connectivity of nearly the entire expanded SBN strengthened  
480 drastically during attack. Thus, although the attack signal may originate from the VMHvl, its  
481 sustenance likely requires the entire network. As a result, modulating many nodes in the  
482 network could cause changes in attack (Chang and Gean, 2019; Chen et al., 2020; Falkner  
483 et al., 2020; Hong et al., 2014; Leroy et al., 2018; Stagkourakis et al., 2018; Unger et al.,  
484 2015; Wong et al., 2016; Yamaguchi et al., 2020; Zelikowsky et al., 2018; Zha et al., 2020).

485 Mount was accompanied by a relatively limited activity increase in the network,  
486 involving seven activated regions vs. twelve during attack. MPN and MeAa demonstrated  
487 the highest activity increase. Interestingly, the activity rise in the MeAa is earlier than MPN,  
488 the most-established region for male sexual behavior. While it is possible that MeAa  
489 activity increase partially reflects changes related to social investigation given that social  
490 investigation often precedes mount, we did not find MeAa to respond the most quickly  
491 during attack, which also often follows close interaction. The functional importance of  
492 MeAa in sexual behaviors remains to be examined. At the network level, the functional  
493 connectivity between many regions also increased during mounting, as in the case of  
494 attack, but connections involving VMHvl remained largely unchanged. This perhaps  
495 explains a lack of deficits in mounting when VMHvl was artificially inhibited, even though  
496 VMHvl is one of the regions with increased activity during mounting (Lee et al., 2014; Lin et  
497 al., 2011). As sexual behavior advances, we saw a clear divergence of activity patterns  
498 across regions. PA, MPN, and BNSTp were the only regions that gradually increased their  
499 activity, peaking during ejaculation. All other regions gradually decreased their activity,  
500 although some increased activity slightly during ejaculation. The neural activity pattern  
501 during advanced sexual behavior was highly distinct and could be used to predict the

502 behaviors reliably. During advanced sexual behaviors, the most striking change at the  
503 network level was an overall decrease in functional connectivity. No connection, regardless  
504 of whether it is between regions responsive or not, is strengthened, and many decrease  
505 below the baseline level. This result suggests that the brain enters a "dissociated" state  
506 during advanced mating. Interestingly, during copulation, male rats are reported to have  
507 drastically reduced sensitivity to pain (Gonzalez-Mariscal et al., 1992; Szechtman et al.,  
508 1981). Although the response threshold to other external cues has not been studied  
509 systematically, anecdotally, we found that male mice appear oblivious to the external world  
510 during deep thrust. Whether these behavior changes result from decreased  
511 communication across brain regions remains to be investigated in future studies.

512

### 513 **The mating-biased network**

514 Here, we propose the MBN for supporting male sexual behaviors, which includes MPN,  
515 BNSTp, PA, and MEAa. These regions, except MeAa, showed a consistent increase  
516 during all stages of male sexual behaviors, with higher responses in more advanced  
517 stages. The activity increase was likely caused by a combination of sensory inputs (e.g.,  
518 olfactory and somatosensory) and internal cues (e.g., hormone and neuromodulator) and  
519 may have been used to drive moment-to-moment actions associated with mating.

520 MPN is unarguably the most studied region for male sexual behaviors. Since 1941,  
521 numerous studies have demonstrated that damage in MPN impaired or abolished male  
522 sexual behaviors without spontaneous recovery, suggesting its irreplaceable role in mating  
523 (Brookhart and Dey, 1941). Both c-Fos and *in vivo* recordings corroborate functional  
524 results (Wei et al., 2018). Our recordings confirm the large increase in MPN activity  
525 throughout the male sexual behaviors. However, we do notice some heterogeneity in MPN  
526 responses across animals. In animals with optic fibers located in posterior MPN, the cell  
527 responses to females tended to be weaker than those with anterior MPN-targeted fibers  
528 (although all animals were included in the analysis). Our recent study suggests that  
529 posterior MPN is mainly activated when facing a social threat and plays a vital role in  
530 suppressing aggression against a superior opponent (Wei et al., Accepted).

531 The role of BNSTpm in male sexual behavior has been long suspected based on the  
532 remarkably dense c-Fos expression after male sexual behaviors (Coolen et al., 1997;  
533 Kollack-Walker and Newman, 1995; Kollack and Newman, 1992; Newman et al., 1997).  
534 However, lesion-induced behavioral deficits are anything but remarkable. Lesioned  
535 animals can execute the whole sequence of male sexual behaviors, although the  
536 intromission interval and the number of intromissions preceding ejaculation increases  
537 (Claro et al., 1995; Emery and Sachs, 1976; Powers et al., 1987; Valcourt and Sachs, 1979)  
538 (but Bayless et al. (2019) report poorer sexual behavior performance after inhibiting  
539 BNSTpm aromatase cells). The BNSTpm<sup>Esr1</sup> cell responses may explain the relatively  
540 minor behavior deficit. As these cells are mainly activated during ejaculation, the most  
541 important function of the cells could be related to ejaculation, such as initiation of  
542 ejaculation, ejaculation-induced sexual satiation, or hormone changes.

543 PA has largely escaped the attention of neuroscientists, possibly due to its relatively  
544 low c-Fos induction after sexual behaviors (Kollack-Walker and Newman, 1997).  
545 Nevertheless, our recent functional studies demonstrated that PA<sup>Esr1</sup> cells are both  
546 necessary and sufficient for male sexual behaviors through their projection to the MPN  
547 (Yamaguchi et al., 2020). Most strikingly, when the PA<sup>Esr1</sup> to MPN projecting cells are  
548 inhibited, males rarely mount and never achieve deep thrust (Yamaguchi et al., 2020).

549 The role of MeAa in sexual behaviors remains elusive. Early studies found that MeAa  
550 lesions could abolish all aspects of male sexual behaviors (Kondo, 1992). However, the  
551 MeApd, but not MeAa, expressed c-Fos specifically after exposure to female pheromone  
552 cues and consequently became the focus of many studies (Fernandez-Fewell and  
553 Meredith, 1994). However, recent cell type-specific ablation argued against the important  
554 role of MeApd in male sexual behaviors (Unger et al., 2015). Consistent with those  
555 functional results, we found no significant activity increase of MeAp<sup>Esr1</sup> cells during male  
556 mating. Given the strong and rapid activation of MeAa during the early phase of male  
557 sexual behavior, future studies are needed to investigate its function in male sexual  
558 behaviors.

559

560 **The aggression-biased network**

561 The proposed ABN contains AHN, DMH, VMHvl, PMv, MeAp, and IPAG based on their  
562 preferential responses during aggression over sexual behaviors. Here, we will summarize  
563 their known functional roles in aggression and highlight the new insights revealed by our  
564 recordings.

565 VMHvl has now been firmly established as a critical site for conspecific aggression  
566 (Lee et al., 2014; Lin et al., 2011; Yang et al., 2013). Consistent with its central role in  
567 aggression, VMHvl shows the largest response during male introduction, investigation and  
568 attack. In particular, VMHvl is the first to respond and one of the top regions to increase  
569 functional connectivity during attack, supporting its central role in attack initiation.

570 PMv is a major input to the VMHvl and is highly responsive to conspecific olfactory  
571 cues (Chen et al., 2020; Motta et al., 2013). Indeed, PMv is among the most activated  
572 regions during male investigation. However, PMv response during attack is relatively weak  
573 and significantly slower than the VMHvl, suggesting its secondary role in initiating attack. It  
574 also suggests that the rise of VMHvl activity during attack is unlikely a result of olfactory  
575 inputs channeling through the PMv.

576 DMH has only been studied recently for its role in aggression. Zelikowsky *et. al.* found  
577 that tachykinin-expressing DMH cells are both necessary and sufficient for social  
578 isolation-induced aggression in male mice, although the neural response of the cells during  
579 attack has not been reported (Zelikowsky et al., 2018). Here, we found that DMH, just like  
580 VMHvl, showed a male-biased response during all stages of social behaviors. Whether  
581 DMH influences aggression mainly through its connection with VMHvl or its parallel  
582 projection to the midbrain, e.g., PAG, remains to be investigated.

583 Several recent studies demonstrated a necessary and sufficient role of MeApd  
584 GABAergic cells in inter-male aggression (Hong et al., 2014; Miller et al., 2019; Nordman  
585 et al., 2020; Padilla et al., 2016; Unger et al., 2015), although the cell *in vivo* Ca<sup>2+</sup>  
586 responses during attack remain unreported. Consistent with the functional results, we  
587 found that MeApd<sup>Esr1</sup> cells increased their activity during both attack and male investigation,  
588 with attack evoking a higher response than mount. MeApd is also a region with

589 substantially increased functional connectivity during attack, especially with VMHvl,  
590 supporting its important role in attack initiation.

591 Consistent with a role in motor action, IPAG<sup>Esr1</sup> cells showed increased activity  
592 exclusively during attack. We previously found that IPAG is a key downstream of VMHvl for  
593 attack initiation, although stimulating VMHvl-IPAG pathway only induces attacks with low  
594 efficiency (Falkner et al., 2020). Indeed, most regions in the ABN project to IPAG to some  
595 extent (Beitz, 1982), and we speculate that IPAG may serve as a common gateway that  
596 integrates inputs from ABN to initiate action. Thus, blocking IPAG is sufficient to block  
597 attack, whereas activating any specific input only triggers attack weakly or not at all  
598 (Falkner et al., 2020).

599 AHN was considered a part of the aggression circuit mainly based on the functional  
600 evidence acquired in hamsters (Ferris et al., 1997; Gobrogge et al., 2007). However, later,  
601 AHN was proposed to be a part of the predator defense circuit instead of the social  
602 behavior circuit, given its strong c-Fos activation after predator encounters (Canteras,  
603 2002; Martinez et al., 2008). Consistent with this hypothesis, Xie *et. al.* recently reported  
604 that AHN GABAergic cells (the main population) bi-directionally control defensive attack  
605 against predators (e.g., snakes), but have little influence on conspecific aggression in mice  
606 (Xie et al., 2020). Here, we found that AHN<sup>Esr1</sup> cells uniquely increased activity during the  
607 action phase of social behaviors, especially attack, calling for further investigation of AHN's  
608 role in fighting and mating.

609 Although PA is considered a part of the mating circuit, it is important to note that PA  
610 does also play a role in male aggression through its projection to VMHvl (Stagkourakis et  
611 al., 2020; Yamaguchi et al., 2020; Zha et al., 2020). PA indeed shows a consistent increase  
612 during both male investigation and attack, although the responses during female  
613 investigation and sexual behaviors are significantly higher. Both aggression- and sexual  
614 behavior-relevant cells in PA express *Esr1* but are largely distinct at the single-cell level  
615 (Yamaguchi et al., 2020).

616 LSV is unique in that it is the only region that did not increase activity during attack. It is  
617 also the only region whose connection with VMHvl is not significantly strengthened during

618 attack. LS has been recognized as a region that "gates" aggression for decades. Early  
619 lesion studies demonstrated that LS damage could cause "septal rage", i.e., unprovoked  
620 ferocious attack (Albert and Chew, 1980). More recent studies confirmed that LS could  
621 negatively modulate aggression at least partly through its GABAergic projection to VMHvl  
622 (Leroy et al., 2018; Wong et al., 2016). In light of these functional results, the lack of activity  
623 increase in LSv may signal "permission" to attack.

624 In summary, we investigated  $Ca^{2+}$  responses in the expanded SBN during social  
625 behaviors in male mice. Our results suggest that the sex identity information is broadly  
626 represented across the expanded SBN. Fighting and mating are associated with highly  
627 distinct patterns of activation in the network. Attack features synchronized activation of  
628 many regions in the limbic system with VMHvl being the potential ignitor. Sexual behavior  
629 is associated with sequential activation of a small set of regions and their gradual changes  
630 during behavior progression. The network activity during advanced copulation is  
631 particularly unique, featuring strong activation of three regions and suppression of others,  
632 and reduced communication across regions. These results provide a holistic view  
633 regarding the neural generation of social behaviors and will serve as an important guide for  
634 future functional studies.

635

## 636 **STAR methods**

### 637 **Experimental model and subject details**

#### 638 **Animals**

639 Experimental mice for MFP recording were socially naïve, *Esr1-2A-Cre* male mice (10–24  
640 weeks, Jackson stock no. 017911). After surgery, all test animals were single-housed.  
641 Intruders used were group-housed BALB/c males or group-housed C57BL/6 females (both  
642 10–36 weeks, Charles River). Mice were housed at 18–23 °C with 40–60% humidity and  
643 maintained on a reversed 12-h light/dark cycle (dark cycle starts at 10 a.m.) with food and  
644 water available ad libitum. All experiments were performed in the dark cycle of the animals.

645 All procedures were approved by the IACUC of NYULMC in compliance with the NIH  
646 guidelines for the care and use of laboratory animals.

## 647 **Method details**

### 648 **Optical setup**

649 The optical setup was a modified version of a typical fiber photometry setup (Falkner et al.,  
650 2016) according to a previously described FIP system (Kim et al., 2016). Briefly, blue LED  
651 light (Thorlabs, M470F1, LEDD1B) was bandpass filtered (Semrock, FF02-472/30-25),  
652 reflected on a dichroic filter (Semrock, FF495-Di03-25x36), and coupled into a  
653 custom-designed 19-fiber multi-fiber bundle (Doric Lenses,  
654 BFP(19)\_100\_110\_1100-0.37\_4m\_FCM-19X) through a 10x objective (Olympus PLN).  
655 Emission light was bandpass filtered (Semrock, FF01-535/50) and projected onto the CCD  
656 sensor of a camera (Basler, acA640-120um) via an achromatic doublet (Thorlabs,  
657 AC254-060-A-ML). The connector end of the fiber bundle was imaged by the camera. The  
658 LED was driven by DC current, and the optical power out of the tip of every single fiber was  
659 set to be ~30  $\mu$ W. The sampling rate of the camera was 25 frames per second.

660

### 661 **Stereotaxic surgery**

662 *Esr1-2A-Cre* mice were anesthetized with 1.5%-2% isoflurane and placed on a stereotaxic  
663 surgery platform (Kopf Instruments, Model 1900). 60-100 nl AAV2-CAG-FLEX-GCaMP6f  
664 viruses (Vigene, custom prepared) or AAV1-CAG-FLEX-GCaMP6f viruses (Addgene,  
665 100835-AAV1, 3x dilution) were delivered unilaterally into each of the following targeted  
666 brain regions as described previously (Fang et al., 2018): LSV (AP 0.05, ML -0.65, DV  
667 -3.25); MPN (AP 0.00, ML -0.33, DV -4.90); BNSTpm (AP -0.30, ML -0.80, DV -3.60); AHN  
668 (AP -1.05, ML -0.55, DV -5.15); DMH (AP -1.75, ML -0.55, DV -5.2); VMHvl (AP -1.70, ML  
669 -0.75, DV -5.80); PMv (AP -2.40, ML -0.55, DV -5.70); MeAa (AP -1.10, ML 2.10, DV -4.90);  
670 MeAp (AP -1.60, ML 2.10, DV -4.92); PA (AP -2.35, ML 2.20, DV -4.92); CoApm (AP -2.85,  
671 ML 2.90, DV -5.20); SUBv (AP -3.35, ML 2.60, DV -4.60); IPAG (AP -4.90, ML -0.45, DV  
672 -2.40). Each regional data included in the final analyses had correct virus expression and



673 fiber tip position as verified by histology.

674 The multi-fiber arrays were constructed using MT Ferrules (US Conec, No 12599) and  
675 100  $\mu\text{m}$ -core optic fibers (Doric Lens, NA0.37) as described previously (Sych et al., 2019).  
676 For each animal, two custom-made multi-fiber arrays were implanted, one designed to  
677 target seven medial regions on the left side and the other to target five lateral regions on  
678 the right side. In the same animal, a custom-made optic-fiber assembly targeting IPAG  
679 (Thorlabs, CFX126-10) was also implanted. All optic fibers are targeted  $\sim 250$   $\mu\text{m}$  above  
680 the injection sites and secured using dental cement (C&B Metabond, S380). IPAG fiber  
681 was implanted at (AP -5.20, ML -0.45, DV -2.00) after tilting the head 8 degrees down  
682 rostrally to avoid collision with the other two arrays. Lastly, a 3D-printed plastic ring for  
683 head fixation was cemented on the skull (Osborne and Dudman, 2014).

684

#### 685 **Behavioral analysis and tracking**

686 Behaviors were recorded under dim room light via two cameras from top and side views  
687 (Basler, acA640-100gm) using StreamPix 5 (Norpix), which also coordinated the MFP  
688 camera in synchrony. Behaviors were then manually annotated and animal positions were  
689 tracked on a frame-by-frame basis using custom software in MATLAB  
690 (<https://pdollar.github.io/toolbox/>). Annotated behaviors are defined as follows:  
691 'Investigation', the resident mouse made nose contact with either the facial or anogenital  
692 region of the intruder mouse or the whole body of the toy mouse; 'Attack', a suite of actions  
693 initiated by the resident toward the male intruder, which included lunges, bites, tumbling  
694 and fast locomotion episodes between such behaviors; 'Mount', began when the resident  
695 male charged toward the rear end of the female body, rose and grasped the female's flank  
696 with his forelimb, and ended by aligning his body with the female's and assuming the  
697 on-top posture; 'Shallow thrust', the male grasped the female's body tightly with his  
698 forelegs and made rapid shallow pelvic thrusts; 'Deep thrust', deep rhythmic movement of  
699 pelvis presumably with penile insertion into the vagina; 'Ejaculation', the male froze at the  
700 end of an intromission event while continuously clutching onto the female and then  
701 slumping to the side of the female. Ejaculation occurred only once in a female session,

702 signaling the end of sexual behaviors. It was always confirmed by the presence of a  
703 vaginal plug after the recording. Behavioral annotations were made by trained  
704 experimenters, during which neural responses were not available to the experimenter. The  
705 animals were tracked using custom MATLAB software  
706 (<https://github.com/pdollar/toolbox>)(Burgos-Artizzu et al., 2012; Lin et al., 2011). The velocity  
707 of the animal was calculated as the distance between the animal's body center locations in  
708 adjacent frames (pixels/s).

709

### 710 **Multi-fiber photometry recording**

711 The recording started three weeks after the virus injection. For each recording session, the  
712 head-mounted MT ferrules were connected to the matching connectors at the end of the  
713 optic fiber bundle (Doric lens, BFP(19)\_100/110/1100-0.37\_4m\_SMA-19x). A drop of liquid  
714 composite (Henry Schein, 7262597) was applied to the outer part of the junction and cured  
715 with blue LED curing light (Amazon) to stabilize the connection. The baseline signal was  
716 checked in the absence of the intruder for at least two days to ensure that the signal reached a  
717 stable level (<10% difference across days for all regions). On the recording day, after 10  
718 minutes of the baseline period, a sexually receptive female mouse was introduced until the  
719 recording male achieved ejaculation or after 60 minutes. Then, 5 minutes after removing the  
720 female, a group-housed non-aggressive Balb/C was introduced for 10 minutes. For some  
721 recording sessions, 5 minutes after removing the male, a novel object (15 mL plastic tube) was  
722 introduced for 10 minutes. Each animal was recorded 2-4 times, with at least three days in  
723 between. The order of male and female presentations was counterbalanced across sessions.

724

### 725 **Data analysis**

726 Regions of interest (ROIs) for selected channels were drawn on the grayscale image of the  
727 optic fiber bundle, and the average pixel intensity for each ROI was calculated as a readout  
728 of the raw  $\text{Ca}^{2+}$  signal ( $F_{\text{raw}}^{\text{aw}}$ ) for the region. We then used the MATLAB function  
729 “msbackadj” with a moving window of 10% get the flattened signal  $F_{\text{flat}}$ . Then the  
730 instantaneous baseline signal was obtained as “ $F_{\text{baseline}} = F_{\text{raw}} - F_{\text{flat}}$ ”. The  $\Delta F/F$  was then

731 calculated as " $\Delta F/F = (F_{\text{raw}} - F_{\text{baseline}})/F_{\text{baseline}}$ ". The  $\Delta F/F$  signal was then Z-scored using the  
732 entire recording trace for each channel. All analyses were based on Z-scored  $\Delta F/F$ .

733 The response magnitude of each behavior for each recording animal was calculated  
734 by first averaging Z-scored  $\Delta F/F$  during all episodes of the behavior in a session and then  
735 averaging the values across all recording sessions of an animal. The difference in  
736 response magnitude between two regions was calculated as the difference of average  
737 responses of two simultaneous recorded regions of a session and analyzed across all  
738 sessions. To compare responses during male-directed and female-directed behaviors (e.g.,  
739 male investigation vs. female investigation), we calculated the magnitude difference  
740 between the behavior towards the male intruder and the female intruder of each session  
741 and analyzed all sessions. To calculate the onset of the response of behavior, e.g., attack,  
742 we first selected responsive trials when the Z-scored  $\Delta F/F$  reached  $>2$ . For those trials, we  
743 then determined the trough time preceding the peak response after smoothing the trace  
744 with a low pass filter (threshold 4 Hz). If a session contained at least three responsive trials  
745 ( $Z > 2$ ), the average onset time of the behavior of the session was computed. Otherwise, the  
746 onset would be registered as NaN. For comparing the onset time during male-directed and  
747 female-directed behavior, e.g., male investigation vs. female investigation, we determined  
748 the average onset during each behavior in one session and calculated their difference. To  
749 compare the onset time of two different regions in one behavior, we identified trials where  
750 both regions showed a peak response  $>2$ , determined response onset for each, and  
751 calculated the difference. We then performed a two-sided t-test (if data passed the  
752 normality test) or Wilcoxon signed-rank test (if data did not pass the normality test) on the  
753 onset time difference using all trials with a null hypothesis that the onset difference was 0.  
754 The peak time during introduction was determined as the latency to reach the maximum  
755 value in the first 30s after intruder introduction. The peak time difference between the two  
756 regions was calculated based on the peak time of simultaneously recorded traces. The  
757 PETHs were constructed by aligning the Z-scored  $\Delta F/F$  to the onset of a behavior,  
758 averaging across trials, averaging across sessions for each animal, and then averaging  
759 across animals.

760 Principal Components Analysis (PCA) was performed using the MATLAB function  
761 "pca." The data submitted to PCA was a 13 x 9 matrix (corresponding to 13 regions and 9  
762 behaviors) whose  $i^{th}, j^{th}$  element is the response magnitude (Z scored  $\Delta F/F$ ) of the  $i^{th}$   
763 region during the  $j^{th}$  behavior, averaged first over trials, then sessions, and finally  
764 subjects. The first four components explained over 99% of the variance.

765 A linear discriminant model for each recording session was constructed using the  
766 MATLAB function "fitcdiscr" using 80% of randomly selected data (training data). The  
767 model was then used to predict the behaviors associated with the remaining 20% (testing  
768 data) of the  $Ca^{2+}$  recording data in each session using MATLAB function "predict". We used  
769 either all the frames (Figure 5) or the frames annotated with specific social behaviors  
770 (Figure S5) for training and testing. For each session, only channels with correct targeting  
771 were used for training and testing the model. The confusion matrix was constructed based  
772 on all the testing data from all sessions of all animals. F1 score was calculated as  $(2 \times$   
773  $\text{precision} \times \text{recall}) / (\text{precision} + \text{recall})$  for each behavior and each recording session and  
774 averaged across sessions. To calculate the F1 score of shuffled data, the recording traces  
775 of all channels were shifted by a random offset (0 to the duration of the recording session)  
776 and used for constructing the discriminant model and predicting the behaviors. This  
777 procedure was performed once for each session.

778 For assessing the contribution of MBN and ABN regions to behavior prediction, we  
779 constructed the discriminant models based on recordings from non-MBN regions or  
780 non-ABN regions and used the model to predict the behaviors. For Figure 5F and Figure  
781 S5C, F1 scores were computed separately for each subject by concatenating results  
782 across sessions.

783 To determine the instantaneous coefficient of determination ( $R^2$ ) between two regions,  
784 we first calculated the first derivative of the Z-scored  $\Delta F/F$  trace as the difference between  
785 adjacent data points (25 points/sec). We then computed the moving-window correlation  
786 (window size: 25 data points) using the MATLAB function "movcorr" and its elementwise  
787 squaring as  $R^2$ . We then calculated the average  $R^2$  during each behavior for each  
788 recording session and the average of all sessions. To determine whether  $R^2$  changed

789 significantly during a behavior, we performed paired t-test (if data passed the normality test)  
790 or sign test (if data did not pass the normality test) between the averaged  $R^2$  during the  
791 behavior and that during the baseline period of the same session across all sessions. The  
792 p values were adjusted using Benjamini & Hochberg procedure for controlling the false  
793 discovery rate (FDR). The graph plot for each behavior was generated using MATLAB  
794 function "graph". The averaged  $R^2$  values during the behavior for all pairs of regions (76 in  
795 total) were used as the weights of connections. Only connections with  $R^2 > 0.1$  were shown.  
796 The size of the node is proportional to the accumulated weight ( $R^2$ ) of the connections  
797 involving the node. To determine the importance of the temporal alignment on the  
798 correlation between regions, we added a slight jitter (randomly selected from 40, 80, 120,  
799 160 and 200 ms) to one of the Z-scored  $\Delta F/F$  traces in each pair of regions and then  
800 calculated the  $R^2$  of all pairs.

801 To determine the relationship between the movement velocity and correlation between  
802 regions, we tracked the animal, and calculated its body center velocity and the average  $R^2$   
803 in the frames with the top 25% movement velocity and those with the bottom 25% velocity  
804 for each session. We then calculated the difference between each session's low-velocity  
805 and high-velocity periods and the average across sessions. To determine the onset of  
806 movement during the baseline period, we determined troughs and peaks in the velocity  
807 trace and selected troughs that precede peaks reaching at least 8 pixels/fr and follow  $> 1$ s  
808 of quiescence (mean velocity  $< 1$  pixel/fr). We then constructed PSTHs of  $R^2$  of each pair of  
809 regions aligned to the movement onset in each session, and calculated the average for  
810 each session and the average PSTHs of all sessions. We then calculated the difference in  
811 averaged  $R^2$  between post- (0 -1 s) and pre-movement (-1 - 0 s) based on the PSTHs. The  
812 movement-sensitive pairs (red-filled circles in Figure S7F and red trace in Figure S7G) are  
813 pairs with a  $\Delta R^2 > 0.01$ .

814

### 815 **Histology and imaging**

816 Mice were over-anesthetized with isoflurane and transcardially perfused with cold 1x  
817 phosphate buffered saline (PBS) followed by cold 4% paraformaldehyde (PFA) in 1x PBS.

818 Heads with implants were post-fixed in 4% PFA for at least 72 h at 4°C and then transferred  
819 into 15% sucrose solution for 48 h, after which brains were carefully extracted and put into  
820 15% sucrose solution at 4°C overnight. Brains were embedded in OCT mounting medium,  
821 frozen on dry ice, and cut into 50 µm-thick sections using a cryostat (Leica). Sections were  
822 collected in a 6-well plate, washed three times with 1x PBS, and counter-stained with DAPI  
823 (1:20,000; Thermo Fisher, D1306) diluted in PBS-T (0.3% Triton X-100 in 1x PBS) for 15  
824 min. After washing with PBS-T once, sections were mounted on Superfrost slides (Fisher  
825 Scientific, 12-550-15) and cover-slipped for imaging via a slide scanner (Olympus, VS120).  
826 10x fluorescent images were acquired to access fiber placements and virus expressions.  
827

## 828 **Quantification and statistical analysis**

829 All statistical analyses were performed using MATLAB 2021a (MathWorks) or Prism 9  
830 (GraphPad). All datasets were tested for normality with the Lilliefors test, whenever  
831 applicable. Parametric tests, including one-sample t-test, paired t-test, and ordinary  
832 one-way ANOVA and multiple-comparison post hoc tests were used if distributions passed  
833 the normality test. If distributions failed the normality test, non-parametric tests, including  
834 one-sample Wilcoxon signed rank test, Wilcoxon signed rank test, and Kruskal-Wallis test,  
835 were used. P values for all multiple one-sample t-tests, one-sample Wilcoxon signed rank  
836 tests, multiple pairs of t-tests, and post-hoc multiple-comparison tests were adjusted using  
837 Benjamini & Hochberg procedure for controlling the false discovery rate. Significance in all  
838 statistical results was indicated as follows: \*  $p < 0.05$ , \*\* $p < 0.01$ , and \*\*\* $p < 0.001$ . Error  
839 bars were presented as mean  $\pm$  s.e.m if most datasets in a figure plot passed the normality  
840 test. Otherwise, error bars were presented as median  $\pm$  25%. No statistical methods were  
841 used to predetermine sample sizes, but our sample sizes were similar to or larger than  
842 those reported previously. Statistical details and sample size can be found in the figure  
843 legends and Table S1.  
844

## 845 References

- 846 Albert, D.J., and Chew, G.L. (1980). The septal forebrain and the inhibitory modulation of attack and  
847 defense in the rat. *Behav Neural Biol* 30, 357-388.
- 848 Allen, W.E., Chen, M.Z., Pichamoorthy, N., Tien, R.H., Pachitariu, M., Luo, L., and Deisseroth, K.  
849 (2019). Thirst regulates motivated behavior through modulation of brainwide neural population  
850 dynamics. *Science* 364, 253.
- 851 Bayless, D.W., Yang, T., Mason, M.M., Susanto, A.A.T., Lobdell, A., and Shah, N.M. (2019). Limbic  
852 Neurons Shape Sex Recognition and Social Behavior in Sexually Naive Males. *Cell*.
- 853 Beitz, A.J. (1982). The organization of afferent projections to the midbrain periaqueductal gray of the rat.  
854 *Neuroscience* 7, 133-159.
- 855 Brookhart, J.M., and Dey, F.L. (1941). Reduction of Sexual Behavior in Male Guinea Pigs by  
856 Hypothalamic Lesions. *American Journal of Physiology-Legacy Content* 133, 551-554.
- 857 Burgos-Artizzu, X.P., Dollár, P., Lin, D., Anderson, D.J., and Perona, P. (2012). Social behavior  
858 recognition in continuous video. Paper presented at: 2012 IEEE Conference on Computer Vision and  
859 Pattern Recognition (IEEE).
- 860 Canteras, N.S. (2002). The medial hypothalamic defensive system: hodological organization and  
861 functional implications. *Pharmacol Biochem Behav* 71, 481-491.
- 862 Canteras, N.S., Simerly, R.B., and Swanson, L.W. (1992a). Connections of the posterior nucleus of the  
863 amygdala. *J Comp Neurol* 324, 143-179.
- 864 Canteras, N.S., Simerly, R.B., and Swanson, L.W. (1992b). Projections of the ventral premammillary  
865 nucleus. *Journal of Comparative Neurology* 324, 195-212.
- 866 Canteras, N.S., Simerly, R.B., and Swanson, L.W. (1995). Organization of projections from the medial  
867 nucleus of the amygdala: a PHAL study in the rat. *J Comp Neurol* 360, 213-245.
- 868 Chang, C.H., and Gean, P.W. (2019). The Ventral Hippocampus Controls Stress-Provoked Impulsive  
869 Aggression through the Ventromedial Hypothalamus in Post-Weaning Social Isolation Mice. *Cell Rep* 28,  
870 1195-1205 e1193.
- 871 Chen, A.X., Yan, J.J., Zhang, W., Wang, L., Yu, Z.X., Ding, X.J., Wang, D.Y., Zhang, M., Zhang, Y.L.,  
872 Song, N., *et al.* (2020). Specific Hypothalamic Neurons Required for Sensing Conspecific Male Cues  
873 Relevant to Inter-male Aggression. *Neuron*.
- 874 Claro, F., Segovia, S., Guilamon, A., and Del Abril, A. (1995). Lesions in the medial posterior region of  
875 the BST impair sexual behavior in sexually experienced and inexperienced male rats. *Brain Res Bull* 36,  
876 1-10.
- 877 Coolen, L.M., Peters, H.J., and Veening, J.G. (1997). Distribution of Fos immunoreactivity following  
878 mating versus anogenital investigation in the male rat brain. *Neuroscience* 77, 1151-1161.
- 879 Cui, G., Jun, S.B., Jin, X., Pham, M.D., Vogel, S.S., Lovinger, D.M., and Costa, R.M. (2013). Concurrent  
880 activation of striatal direct and indirect pathways during action initiation. *Nature* 494, 238-242.
- 881 Dai, B., Sun, F., Tong, X., Ding, Y., Kuang, A., Osakada, T., Li, Y., and Lin, D. (2022). Responses and  
882 functions of dopamine in nucleus accumbens core during social behaviors. *Cell Rep* 40, 111246.
- 883 Dong, H.W., and Swanson, L.W. (2004). Projections from bed nuclei of the stria terminalis, posterior  
884 division: implications for cerebral hemisphere regulation of defensive and reproductive behaviors. *J*  
885 *Comp Neurol* 471, 396-433.
- 886 Edwards, D., and Burge, K. (1971). Early androgen treatment and male and female sexual behavior in  
887 mice. *Hormones and Behavior* 2, 49-58.



- 888 Emery, D.E., and Sachs, B.D. (1976). Copulatory behavior in male rats with lesions in the bed nucleus of  
889 the stria terminalis. *Physiol Behav* *17*, 803-806.
- 890 Falkner, A.L., Grosenick, L., Davidson, T.J., Deisseroth, K., and Lin, D. (2016). Hypothalamic control of  
891 male aggression-seeking behavior. *Nat Neurosci* *19*, 596-604.
- 892 Falkner, A.L., Wei, D., Song, A., Watssek, L.W., Chen, I., Chen, P., Feng, J.E., and Lin, D. (2020).  
893 Hierarchical Representations of Aggression in a Hypothalamic-Midbrain Circuit. *Neuron*.
- 894 Fang, Y.-Y., Yamaguchi, T., Song, S.C., Tritsch, N.X., and Lin, D. (2018). A Hypothalamic Midbrain  
895 Pathway Essential for Driving Maternal Behaviors. *Neuron* *98*, 192-207.e110.
- 896 Fernandez-Fewell, G.D., and Meredith, M. (1994). c-fos expression in vomeronasal pathways of mated  
897 or pheromone-stimulated male golden hamsters: contributions from vomeronasal sensory input and  
898 expression related to mating performance. *J Neurosci* *14*, 3643-3654.
- 899 Ferris, C.F., Melloni, R.H., Jr., Koppel, G., Perry, K.W., Fuller, R.W., and Delville, Y. (1997).  
900 Vasopressin/serotonin interactions in the anterior hypothalamus control aggressive behavior in golden  
901 hamsters. *J Neurosci* *17*, 4331-4340.
- 902 Gao, S.C., Wei, Y.C., Wang, S.R., and Xu, X.H. (2019). Medial Preoptic Area Modulates Courtship  
903 Ultrasonic Vocalization in Adult Male Mice. *Neurosci Bull* *35*, 697-708.
- 904 Gobrogge, K.L., Liu, Y., Jia, X., and Wang, Z. (2007). Anterior hypothalamic neural activation and  
905 neurochemical associations with aggression in pair-bonded male prairie voles. *J Comp Neurol* *502*,  
906 1109-1122.
- 907 Gonzalez-Mariscal, G., Gomora, P., Caba, M., and Beyer, C. (1992). Copulatory analgesia in male rats  
908 ensues from arousal, motor activity, and genital stimulation: blockage by manipulation and restraint.  
909 *Physiol Behav* *51*, 775-781.
- 910 Goodson, J.L. (2005). The vertebrate social behavior network: evolutionary themes and variations. *Horm*  
911 *Behav* *48*, 11-22.
- 912 Gunaydin, L.A., Grosenick, L., Finkelstein, J.C., Kauvar, I.V., Fenno, L.E., Adhikari, A., Lammel, S.,  
913 Mirzabekov, J.J., Airan, R.D., Zalocusky, K.A., *et al.* (2014). Natural neural projection dynamics  
914 underlying social behavior. *Cell* *157*, 1535-1551.
- 915 Guo, Q., Zhou, J., Feng, Q., Lin, R., Gong, H., Luo, Q., Zeng, S., Luo, M., and Fu, L. (2015).  
916 Multi-channel fiber photometry for population neuronal activity recording. *Biomed Opt Express* *6*,  
917 3919-3931.
- 918 Hashikawa, K., Hashikawa, Y., Tremblay, R., Zhang, J., Feng, J.E., Sabol, A., Piper, W.T., Lee, H., Rudy,  
919 B., and Lin, D. (2017). Esr1+ cells in the ventromedial hypothalamus control female aggression. *Nat*  
920 *Neurosci*.
- 921 Hong, W., Kim, D.W., and Anderson, D.J. (2014). Antagonistic control of social versus repetitive  
922 self-grooming behaviors by separable amygdala neuronal subsets. *Cell* *158*, 1348-1361.
- 923 Hull, E.M., and Dominguez, J.M. (2007). Sexual behavior in male rodents. *Horm Behav* *52*, 45-55.
- 924 Jennings, K.J., and de Lecea, L. (2020). Neural and Hormonal Control of Sexual Behavior.  
925 *Endocrinology* *161*.
- 926 Juavinett, A.L., Bekheet, G., and Churchland, A.K. (2019). Chronically implanted Neuropixels probes  
927 enable high-yield recordings in freely moving mice. *Elife* *8*.
- 928 Jun, J.J., Steinmetz, N.A., Siegle, J.H., Denman, D.J., Bauza, M., Barbarits, B., Lee, A.K., Anastassiou,  
929 C.A., Andrei, A., Aydin, C., *et al.* (2017). Fully integrated silicon probes for high-density recording of  
930 neural activity. *Nature* *551*, 232-236.
- 931 Karigo, T., Kennedy, A., Yang, B., Liu, M., Tai, D., Wahle, I.A., and Anderson, D.J. (2020). Distinct



- 932 hypothalamic control of same- and opposite-sex mounting behaviour in mice. *Nature*.
- 933 Kim, C.K., Yang, S.J., Pichamoorthy, N., Young, N.P., Kauvar, I., Jennings, J.H., Lerner, T.N., Berndt, A.,  
934 Lee, S.Y., Ramakrishnan, C., *et al.* (2016). Simultaneous fast measurement of circuit dynamics at  
935 multiple sites across the mammalian brain. *Nat Methods* *13*, 325-328.
- 936 Kollack-Walker, S., and Newman, S.W. (1995). Mating and agonistic behavior produce different patterns  
937 of Fos immunolabeling in the male Syrian hamster brain. *Neuroscience* *66*, 721-736.
- 938 Kollack-Walker, S., and Newman, S.W. (1997). Mating-induced expression of c-fos in the male Syrian  
939 hamster brain: role of experience, pheromones, and ejaculations. *J Neurobiol* *32*, 481-501.
- 940 Kollack, S.S., and Newman, S.W. (1992). Mating-Behavior Induces Selective Expression of Fos Protein  
941 within the Chemosensory Pathways of the Male Syrian-Hamster Brain. *Neurosci Lett* *143*, 223-228.
- 942 Kondo, Y. (1992). Lesions of the medial amygdala produce severe impairment of copulatory behavior in  
943 sexually inexperienced male rats. *Physiology & Behavior* *51*, 939-943.
- 944 Lee, H., Kim, D.W., Remedios, R., Anthony, T.E., Chang, A., Madisen, L., Zeng, H., and Anderson, D.J.  
945 (2014). Scalable control of mounting and attack by *Esr1+* neurons in the ventromedial hypothalamus.  
946 *Nature* *509*, 627-632.
- 947 Lenschow, C., and Lima, S.Q. (2020). In the mood for sex: neural circuits for reproduction. *Current*  
948 *opinion in neurobiology* *60*, 155-168.
- 949 Leroy, F., Park, J., Asok, A., Brann, D.H., Meira, T., Boyle, L.M., Buss, E.W., Kandel, E.R., and  
950 Siegelbaum, S.A. (2018). A circuit from hippocampal CA2 to lateral septum disinhibits social aggression.  
951 *Nature* *564*, 213-218.
- 952 Lin, D., Boyle, M.P., Dollar, P., Lee, H., Lein, E.S., Perona, P., and Anderson, D.J. (2011). Functional  
953 identification of an aggression locus in the mouse hypothalamus. *Nature* *470*, 221-226.
- 954 Lin, M.Z., and Schnitzer, M.J. (2016). Genetically encoded indicators of neuronal activity. *Nat Neurosci*  
955 *19*, 1142-1153.
- 956 Lischinsky, J.E., and Lin, D. (2020). Neural mechanisms of aggression across species. *Nat Neurosci*.
- 957 Martinez, R.C., Carvalho-Netto, E.F., Amaral, V.C., Nunes-de-Souza, R.L., and Canteras, N.S. (2008).  
958 Investigation of the hypothalamic defensive system in the mouse. *Behav Brain Res* *192*, 185-190.
- 959 McCarthy, M.M. (2008). Estradiol and the developing brain. *Physiol Rev* *88*, 91-124.
- 960 Michael, V., Goffinet, J., Pearson, J., Wang, F., Tschida, K., and Mooney, R. (2020). Circuit and synaptic  
961 organization of forebrain-to-midbrain pathways that promote and suppress vocalization. *Elife* *9*.
- 962 Miller, S.M., Marcotulli, D., Shen, A., and Zweifel, L.S. (2019). Divergent medial amygdala projections  
963 regulate approach-avoidance conflict behavior. *Nat Neurosci* *22*, 565-575.
- 964 Mitra, S.W., Hoskin, E., Yudkovitz, J., Pear, L., Wilkinson, H.A., Hayashi, S., Pfaff, D.W., Ogawa, S.,  
965 Rohrer, S.P., Schaeffer, J.M., *et al.* (2003). Immunolocalization of estrogen receptor beta in the mouse  
966 brain: comparison with estrogen receptor alpha. *Endocrinology* *144*, 2055-2067.
- 967 Morali, G., Asuncion Pia Soto, M., Luis Contreras, J., Arteaga, M., Gonzalez-Vidal, M.D., and Beyer, C.  
968 (2003). Detailed analysis of the male copulatory motor pattern in mammals: hormonal bases. *Scand J*  
969 *Psychol* *44*, 279-288.
- 970 Motta, S.C., Guimaraes, C.C., Furigo, I.C., Sukikara, M.H., Baldo, M.V., Lonstein, J.S., and Canteras,  
971 N.S. (2013). Ventral preammillary nucleus as a critical sensory relay to the maternal aggression  
972 network. *Proc Natl Acad Sci U S A* *110*, 14438-14443.
- 973 Newman, S.W. (1999). The medial extended amygdala in male reproductive behavior. A node in the  
974 mammalian social behavior network. *Ann N Y Acad Sci* *877*, 242-257.
- 975 Newman, S.W., Parfitt, D.B., and Kollack-Walker, S. (1997). Mating-induced c-fos expression patterns

976 complement and supplement observations after lesions in the male Syrian hamster brain. *Ann N Y Acad*  
977 *Sci* 807, 239-259.

978 Nordman, J.C., Ma, X., Gu, Q., Potegal, M., Li, H., Kravitz, A.V., and Li, Z. (2020). Potentiation of  
979 Divergent Medial Amygdala Pathways Drives Experience-Dependent Aggression Escalation. *J Neurosci*  
980 40, 4858-4880.

981 Ogawa, S., Chester, A.E., Hewitt, S.C., Walker, V.R., Gustafsson, J.A., Smithies, O., Korach, K.S., and  
982 Pfaff, D.W. (2000). Abolition of male sexual behaviors in mice lacking estrogen receptors alpha and beta  
983 (alpha beta ERKO). *Proc Natl Acad Sci U S A* 97, 14737-14741.

984 Ogawa, S., Lubahn, D.B., Korach, K.S., and Pfaff, D.W. (1997). Behavioral effects of estrogen receptor  
985 gene disruption in male mice. *Proc Natl Acad Sci U S A* 94, 1476-1481.

986 Osborne, J.E., and Dudman, J.T. (2014). RIVETS: a mechanical system for in vivo and in vitro  
987 electrophysiology and imaging. *PLoS One* 9, e89007.

988 Padilla, S.L., Qiu, J., Soden, M.E., Sanz, E., Nestor, C.C., Barker, F.D., Quintana, A., Zweifel, L.S.,  
989 Ronnekleiv, O.K., Kelly, M.J., *et al.* (2016). Agouti-related peptide neural circuits mediate adaptive  
990 behaviors in the starved state. *Nat Neurosci* 19, 734-741.

991 Pardo-Bellver, C., Cadiz-Moretti, B., Novejarque, A., Martinez-Garcia, F., and Lanuza, E. (2012).  
992 Differential efferent projections of the anterior, posteroventral, and posterodorsal subdivisions of the  
993 medial amygdala in mice. *Front Neuroanat* 6, 33.

994 Powers, J.B., Newman, S.W., and Bergondy, M.L. (1987). MPOA and BNST lesions in male Syrian  
995 hamsters: differential effects on copulatory and chemoinvestigatory behaviors. *Behav Brain Res* 23,  
996 181-195.

997 Siegel, M., Buschman, T.J., and Miller, E.K. (2015). Cortical information flow during flexible  
998 sensorimotor decisions. *Science* 348, 1352-1355.

999 Soden, M.E., Miller, S.M., Burgeno, L.M., Phillips, P.E.M., Hnasko, T.S., and Zweifel, L.S. (2016).  
1000 Genetic Isolation of Hypothalamic Neurons that Regulate Context-Specific Male Social Behavior. *Cell*  
1001 *Rep* 16, 304-313.

1002 Stagkourakis, S., Spigolon, G., Liu, G., and Anderson, D.J. (2020). Experience-dependent plasticity in an  
1003 innate social behavior is mediated by hypothalamic LTP. *Proc Natl Acad Sci U S A* 117, 25789-25799.

1004 Stagkourakis, S., Spigolon, G., Williams, P., Protzmann, J., Fisone, G., and Broberger, C. (2018). A  
1005 neural network for intermale aggression to establish social hierarchy. *Nat Neurosci* 21, 834-842.

1006 Steinmetz, N.A., Zatzka-Haas, P., Carandini, M., and Harris, K.D. (2019). Distributed coding of choice,  
1007 action and engagement across the mouse brain. *Nature* 576, 266-273.

1008 Sych, Y., Chernysheva, M., Sumanovski, L.T., and Helmchen, F. (2019). High-density multi-fiber  
1009 photometry for studying large-scale brain circuit dynamics. *Nat Methods*.

1010 Szechtman, H., Hershkowitz, M., and Simantov, R. (1981). Sexual behavior decreases pain sensitivity  
1011 and stimulated endogenous opioids in male rats. *Eur J Pharmacol* 70, 279-285.

1012 Unger, E.K., Burke, K.J., Jr., Yang, C.F., Bender, K.J., Fuller, P.M., and Shah, N.M. (2015). Medial  
1013 amygdalar aromatase neurons regulate aggression in both sexes. *Cell Rep* 10, 453-462.

1014 Valcourt, R.J., and Sachs, B.D. (1979). Penile reflexes and copulatory behavior in male rats following  
1015 lesions in the bed nucleus of the stria terminalis. *Brain Res Bull* 4, 131-133.

1016 Wang, L., Talwar, V., Osakada, T., Kuang, A., Guo, Z., Yamaguchi, T., and Lin, D. (2019). Hypothalamic  
1017 Control of Conspecific Self-Defense. *Cell Rep* 26, 1747-1758 e1745.

1018 Wei, D., Osakada, T., Guo, Z., Yamaguchi, T., Varshneya, A., Yan, R., Jiang, Y., and Lin, D. (Accepted).  
1019 A hypothalamic pathway that suppresses aggression towards superior opponents. *Nature Neuroscience*.

- 1020 Wei, Y.C., Wang, S.R., Jiao, Z.L., Zhang, W., Lin, J.K., Li, X.Y., Li, S.S., Zhang, X., and Xu, X.H. (2018).  
1021 Medial preoptic area in mice is capable of mediating sexually dimorphic behaviors regardless of gender.  
1022 *Nat Commun* 9, 279.
- 1023 Wersinger, S.R., Sannen, K., Villalba, C., Lubahn, D.B., Rissman, E.F., and De Vries, G.J. (1997).  
1024 Masculine sexual behavior is disrupted in male and female mice lacking a functional estrogen receptor  
1025 alpha gene. *Hormones and Behavior* 32, 176-183.
- 1026 Wong, L.C., Wang, L., D'Amour, J.A., Yumita, T., Chen, G., Yamaguchi, T., Chang, B.C., Bernstein, H.,  
1027 You, X., Feng, J.E., *et al.* (2016). Effective Modulation of Male Aggression through Lateral Septum to  
1028 Medial Hypothalamus Projection. *Curr Biol* 26, 593-604.
- 1029 Wu, M.V., and Shah, N.M. (2011). Control of masculinization of the brain and behavior. *Current opinion*  
1030 *in neurobiology* 21, 116-123.
- 1031 Xie, Z., Gu, H., Shang, C., Cheng, X., Tang, Z., Zhan, C., Zhang, F., and Cao, P. (2020). Hypothalamic  
1032 circuits for mechanically-evoked defensive attack.
- 1033 Yamaguchi, T., Wei, D., Song, S.C., Lim, B., Tritsch, N.X., and Lin, D. (2020). Posterior amygdala  
1034 regulates sexual and aggressive behaviors in male mice. *Nat Neurosci* 23, 1111-1124.
- 1035 Yang, C.F., Chiang, M.C., Gray, D.C., Prabhakaran, M., Alvarado, M., Juntti, S.A., Unger, E.K., Wells,  
1036 J.A., and Shah, N.M. (2013). Sexually dimorphic neurons in the ventromedial hypothalamus govern  
1037 mating in both sexes and aggression in males. *Cell* 153, 896-909.
- 1038 Yang, T., Yang, C.F., Chizari, M.D., Maheswaranathan, N., Burke, K.J., Jr., Borius, M., Inoue, S., Chiang,  
1039 M.C., Bender, K.J., Ganguli, S., *et al.* (2017). Social Control of Hypothalamus-Mediated Male  
1040 Aggression. *Neuron* 95, 955-970 e954.
- 1041 Zelikowsky, M., Hui, M., Karigo, T., Choe, A., Yang, B., Blanco, M.R., Beadle, K., Gradinaru, V.,  
1042 Deverman, B.E., and Anderson, D.J. (2018). The Neuropeptide Tac2 Controls a Distributed Brain State  
1043 Induced by Chronic Social Isolation Stress. *Cell* 173, 1265-1279 e1219.
- 1044 Zha, X., Wang, L., Jiao, Z.L., Yang, R.R., Xu, C., and Xu, X.H. (2020). VMHvl-Projecting Vglut1+  
1045 Neurons in the Posterior Amygdala Gate Territorial Aggression. *Cell Rep* 31, 107517.
- 1046 Zhu, Z., Ma, Q., Yang, H., Miao, L., Pan, L., Li, K., Zhang, X., Wu, J., Hao, S., Lin, S., *et al.* (2020). A  
1047 Substantia Innominata-midbrain Circuit Controls a General Aggressive State.
- 1048

# Figure 1

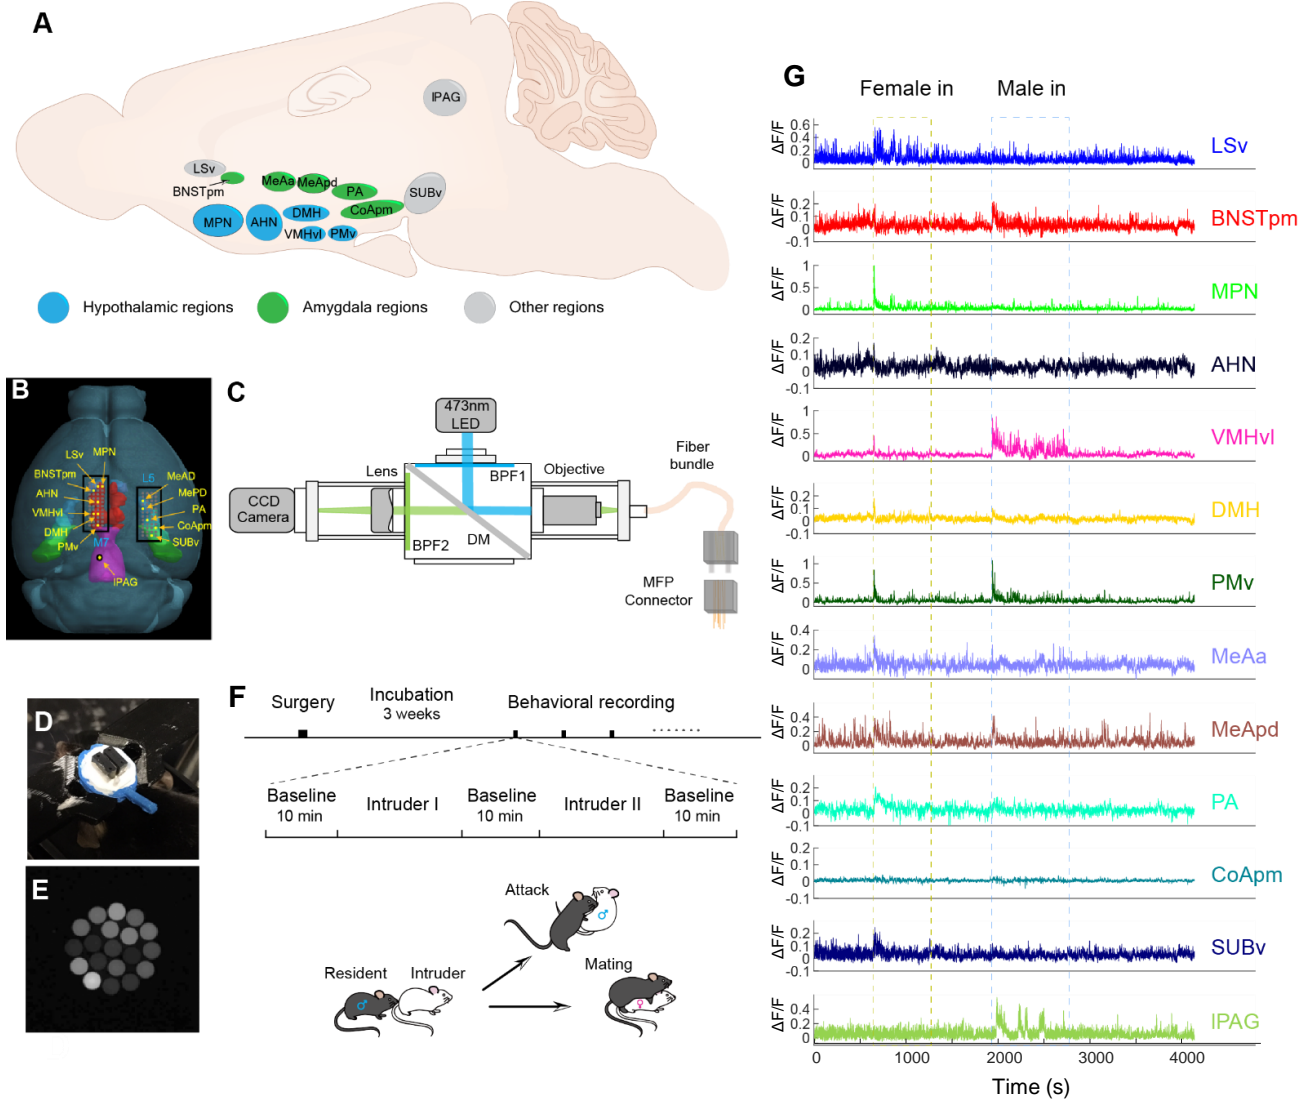

**Figure 1: Multi-fiber photometry (MFP) recording of 13 regions in the limbic system.**

**A.** Illustration showing the recorded regions in mouse hypothalamus (blue), amygdala (green), and other brain areas (gray).

**B.** The optic fiber arrays overlaid on a 3D mouse brain model showing various targeted structures. The model is from <https://connectivity.brain-map.org/>.

**C.** Diagram of the MFP recording system.

**D.** An animal with the implanted fiber arrays and a head-fixation ring.

**E.** An image showing the end of the optic fiber bundle.

**F.** Experimental and each recording session timeline.

**G.** Simultaneously recorded GCaMP6f traces ( $\Delta F/F$ ) from a representative recording session.

# Figure 2

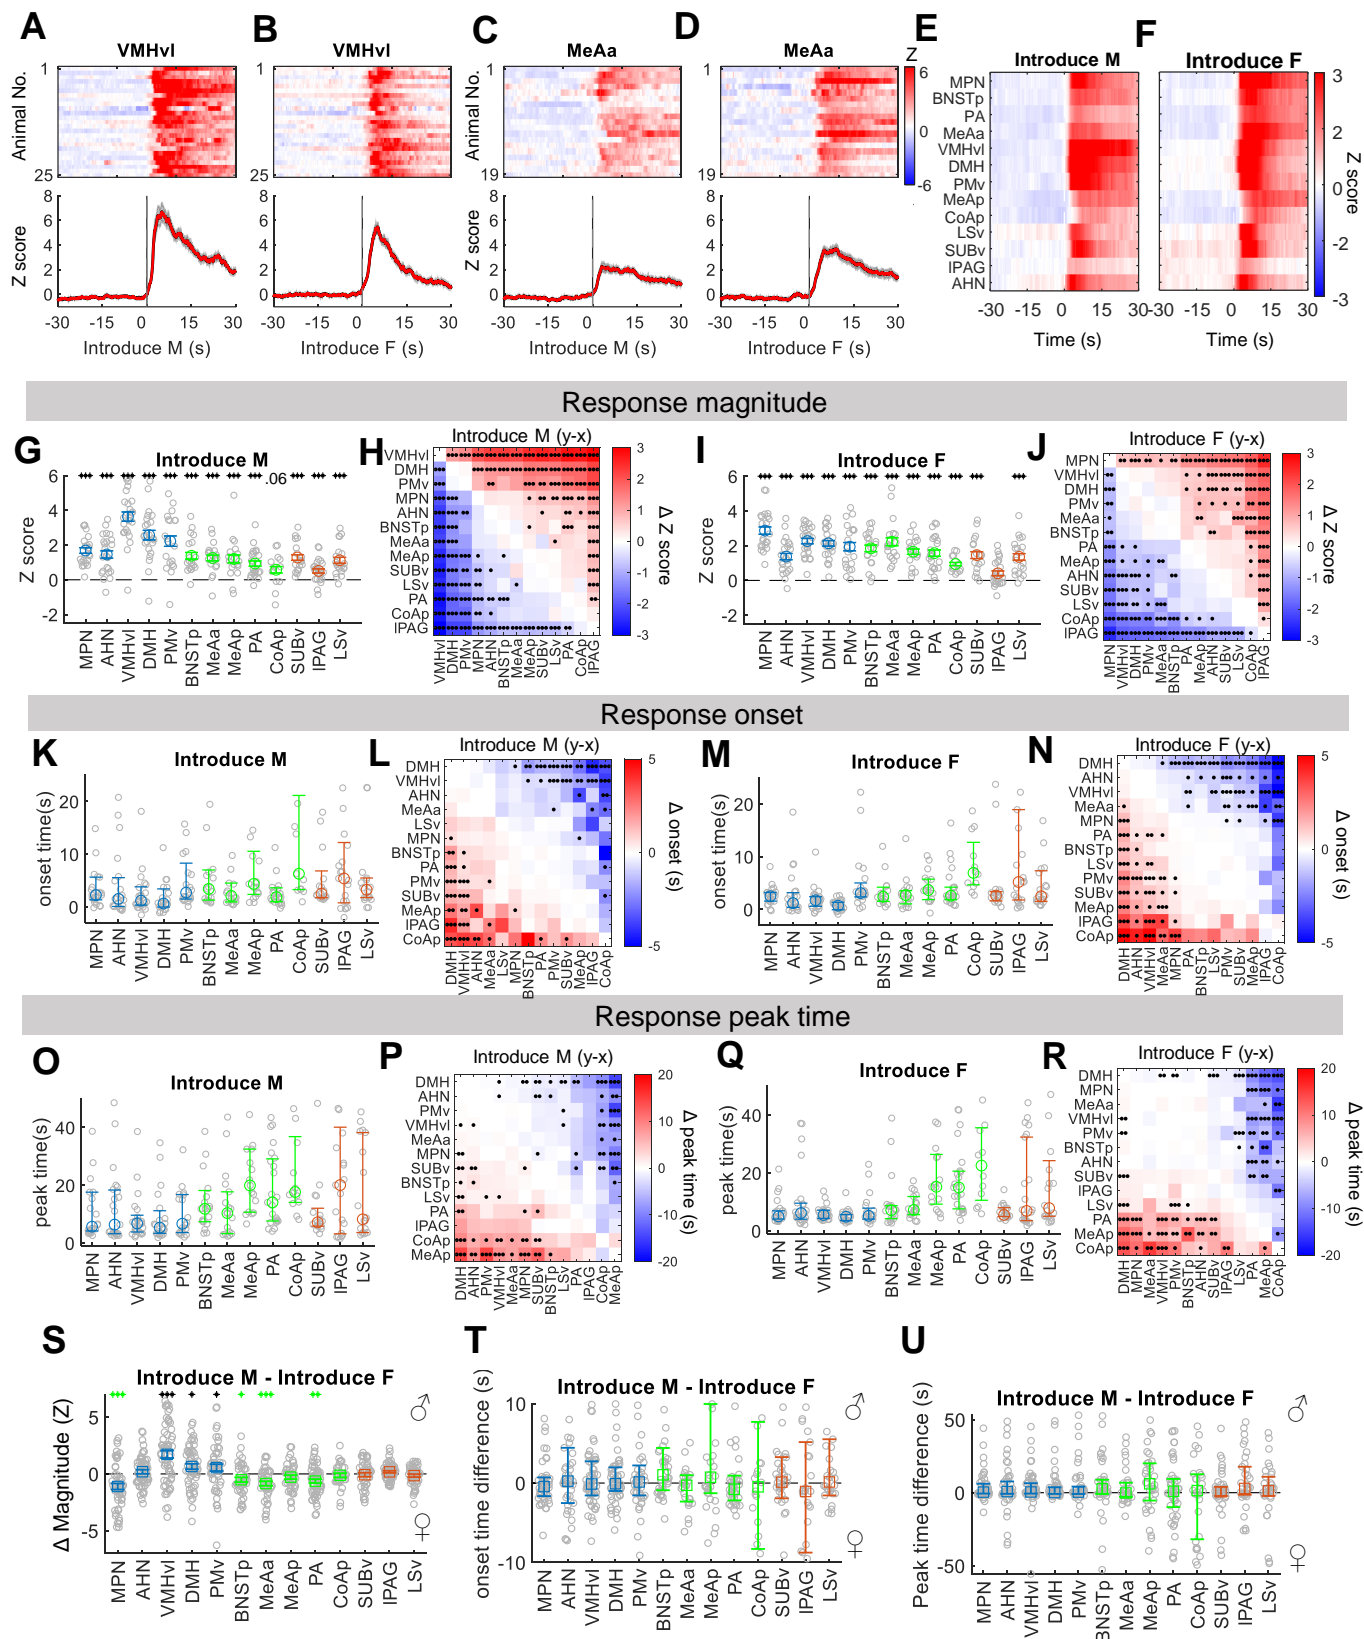

## Figure 2: Broad activation of the expanded SBN during initial encounters with male and female intruders.

**A-B.** Heatmap (top) and PETHs (bottom) of Z scored  $\Delta F/F$  signal of the VMHvl aligned to the male (**A**) and female (**B**) intruder introduction from all recording animals.

**C-D.** Heatmap (top) and PETHs (bottom) of MeAa  $Ca^{2+}$  signals aligned to the male (**C**) and female (**D**) intruder introduction from all recording animals.

**E-F.** Heatmaps showing average Z-scored  $\Delta F/F$  aligned to male (**E**) and female (**F**) introduction across all recorded regions.

**G and I.** Average Z-scored  $\Delta F/F$  during 0-30s after male (**G**) and female (**I**) introduction. n =13-25 animals.

**H and J.** Heatmap showing the difference in average Z-scored  $\Delta F/F$  during male (**H**) and female (**J**) introduction between each pair of regions. n = 21-61 sessions.

**K and M.** Average onset of responses upon male (**K**) and female (**M**) introduction. n =12-25 animals.

**L and N.** Heatmap showing the difference in average response onset upon male (**L**) and female (**N**) introduction between each pair of regions. n = 17-59 sessions.

**O and Q.** Average latency to the peak response after male (**O**) and female (**Q**) introduction. n =13-25 animals.

**P and R.** Heatmap showing the difference in average response peak time after male (**P**) and female (**R**) introduction between each pair of regions. n = 17-59 sessions.

**S, T, and U.** Differences in response magnitude (Z scored  $\Delta F/F$ ) (**S**), onset time (**T**), and peak time (**U**) during the male and female introduction. n = 28-63 sessions.

Shades in **A-D** and error bars in **G, I, and S**: Mean  $\pm$  SEM; in **M, O, Q, T and U**: Median  $\pm$  25%. Each gray circle in **G, I, K, M, O, and Q** represents one animal. Each gray circle in **S-U** represents one recording session.

**G, I, S T and U:** one sample t-test (if pass Lilliefors normality test) or Wilcoxon signed-rank test (if not pass Lilliefors normality test) and p values are adjusted with Benjamini Hochberg procedure for controlling the false discovery rate. **H, J, L, N, P, and R:** paired t-test (if pass Lilliefors normality test) or Wilcoxon signed-rank test (if not pass Lilliefors normality test) and p values are adjusted with Benjamini Hochberg procedure for controlling the false discovery rate. \*p<0.05; \*\*p<0.01; \*\*\*p<0.001. See Table S1 for raw data and detailed statistics.



# Figure 3

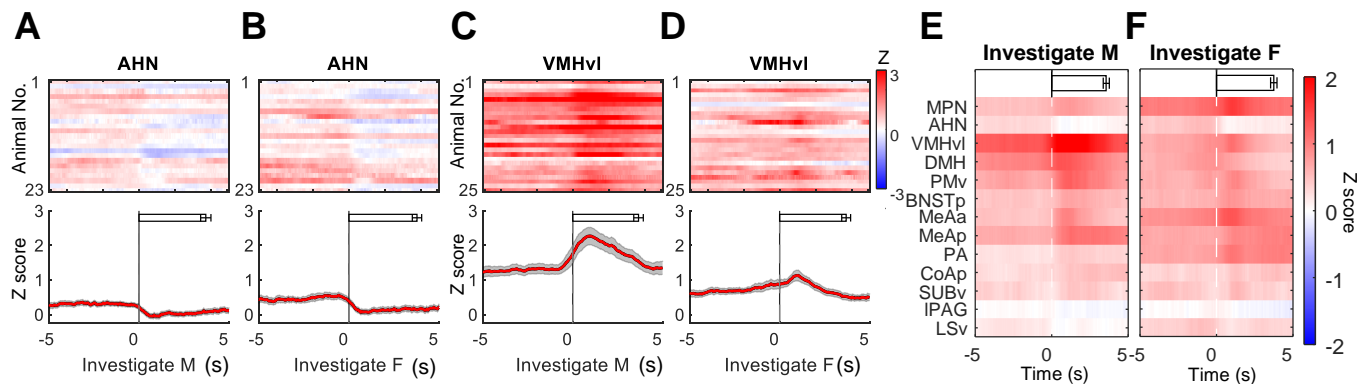

## Response magnitude

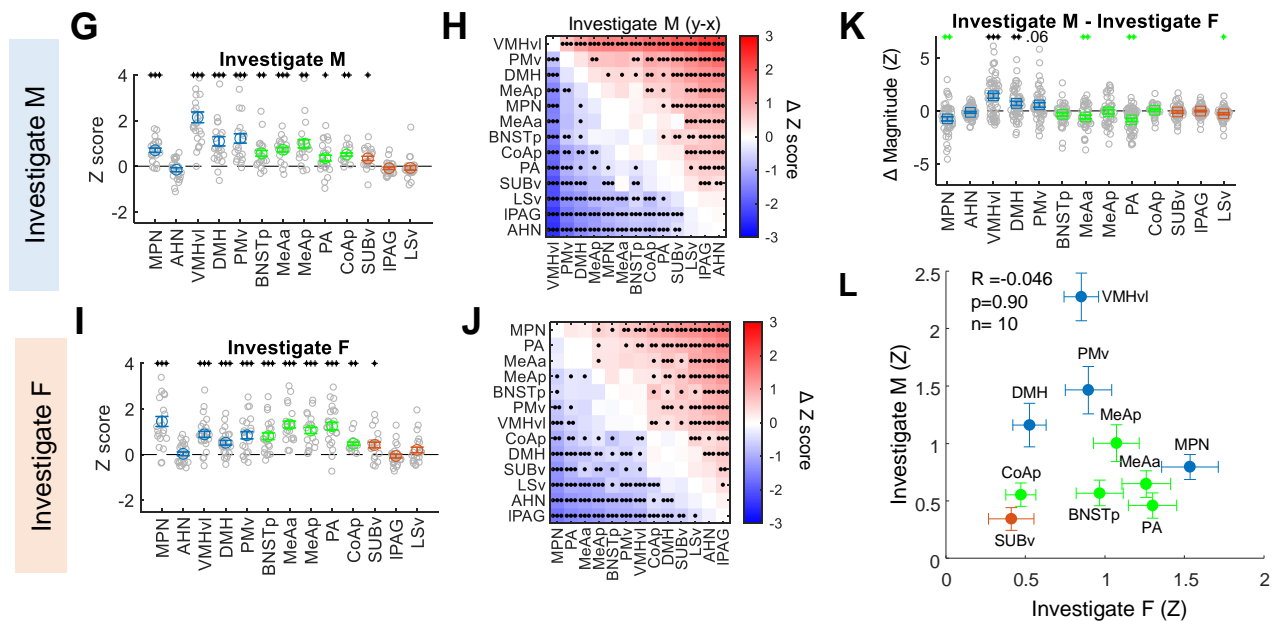

## Response onset

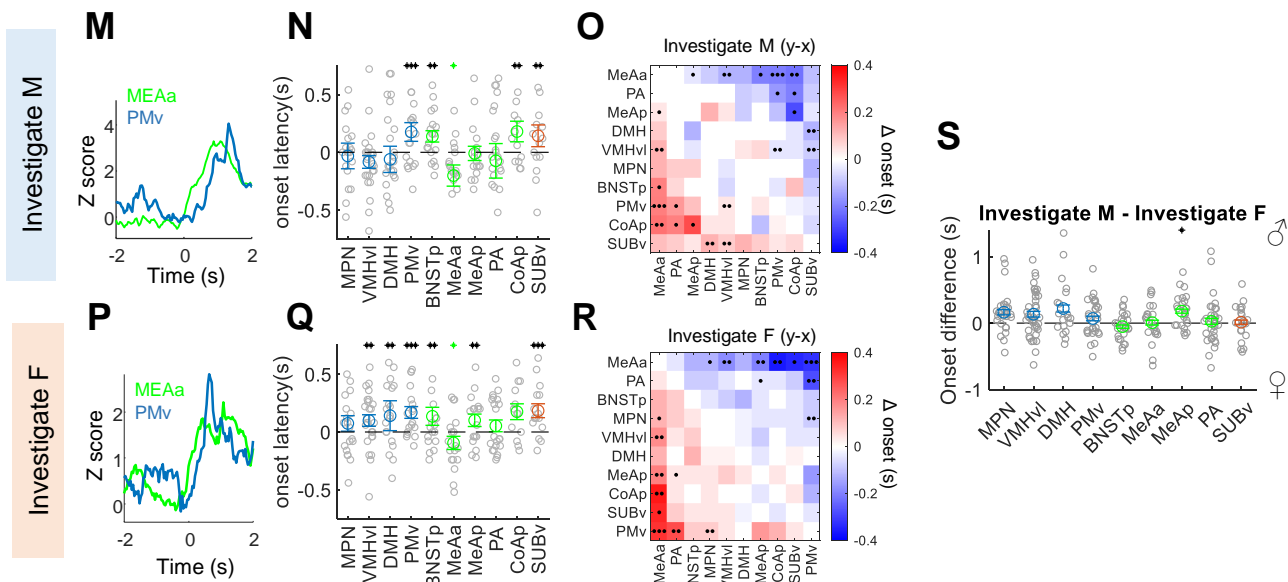

**Figure 3: The same regions are activated during male and female investigation but with distinct patterns.**

**A-B.** Heatmap (top) and PETHs (bottom) of Z scored  $\Delta F/F$  signal of the AHN aligned to the investigation of male (**A**) and female (**B**) intruders from all recording animals. Horizontal bars indicate investigation duration (mean  $\pm$  SEM).

**C-D.** Heatmap (top) and PETHs (bottom) of VMHvl  $Ca^{2+}$  signal aligned to the investigation of male (**C**) and female (**D**) intruders from all recording animals. Horizontal bars indicate investigation duration (mean  $\pm$  SEM).

**E-F.** Heatmaps showing average Z-scored  $\Delta F/F$  aligned to the investigation of male (**E**) and female (**F**) intruders across all recorded regions. Horizontal bars indicate investigation duration (mean  $\pm$  SEM).

**G and I.** Average Z-scored  $\Delta F/F$  during the investigation of male (**G**) and female (**I**) intruders. n = 13-25 animals.

**H and J.** Heatmap showing the difference in average Z-scored  $\Delta F/F$  during male (**H**) and female (**J**) investigation between each pair of regions. n = 19-60 sessions.

**K.** Differences in response magnitude (Z-scored  $\Delta F/F$ ) during the male and female investigation. n = 31-59 sessions.

**L.** Scatter plot showing that response magnitude during the male and female investigation is not correlated. n=10 responsive regions.

**M and P.** Representative simultaneously recorded  $Ca^{2+}$  traces of MeAa and PMv Esr1 cells during investigating male (**M**) and female (**P**) intruders.

**N and Q.** The response latency during male investigation (**N**) and female investigation (**Q**) of all responsive regions. n = 13-25 animals.

**O and R.** Heatmap showing the difference in average response onset during male (**O**) and female (**R**) investigation between each pair of regions. n = 32-345 trials.

**S.** Differences in response onset during the male and female investigation. n = 21-39 sessions.

All error bars and shades in PETHs: Mean  $\pm$  SEM; Each gray circle in **G, I, N,** and **Q** represents one animal. Each gray circle in **K** and **S** represents one recording session.

**G, I, K, N, Q,** and **S:** one sample t-test (if pass Lilliefors normality test) or Wilcoxon signed-rank test (if not pass Lilliefors normality test) and p values are adjusted with Benjamini Hochberg procedure for controlling the false discovery rate. **H, J, O,** and **R:** paired t-test (if pass Lilliefors normality test) or Wilcoxon signed-rank test (if not pass Lilliefors normality test) and p values are adjusted with Benjamini Hochberg procedure for controlling the false discovery rate. \*p<0.05; \*\*p<0.01; \*\*\*p<0.001. Black and green indicate the average values above or below 0, respectively. **L:** Pearson's cross-correlation. See Table S1 for raw data and detailed statistics.



# Figure 4

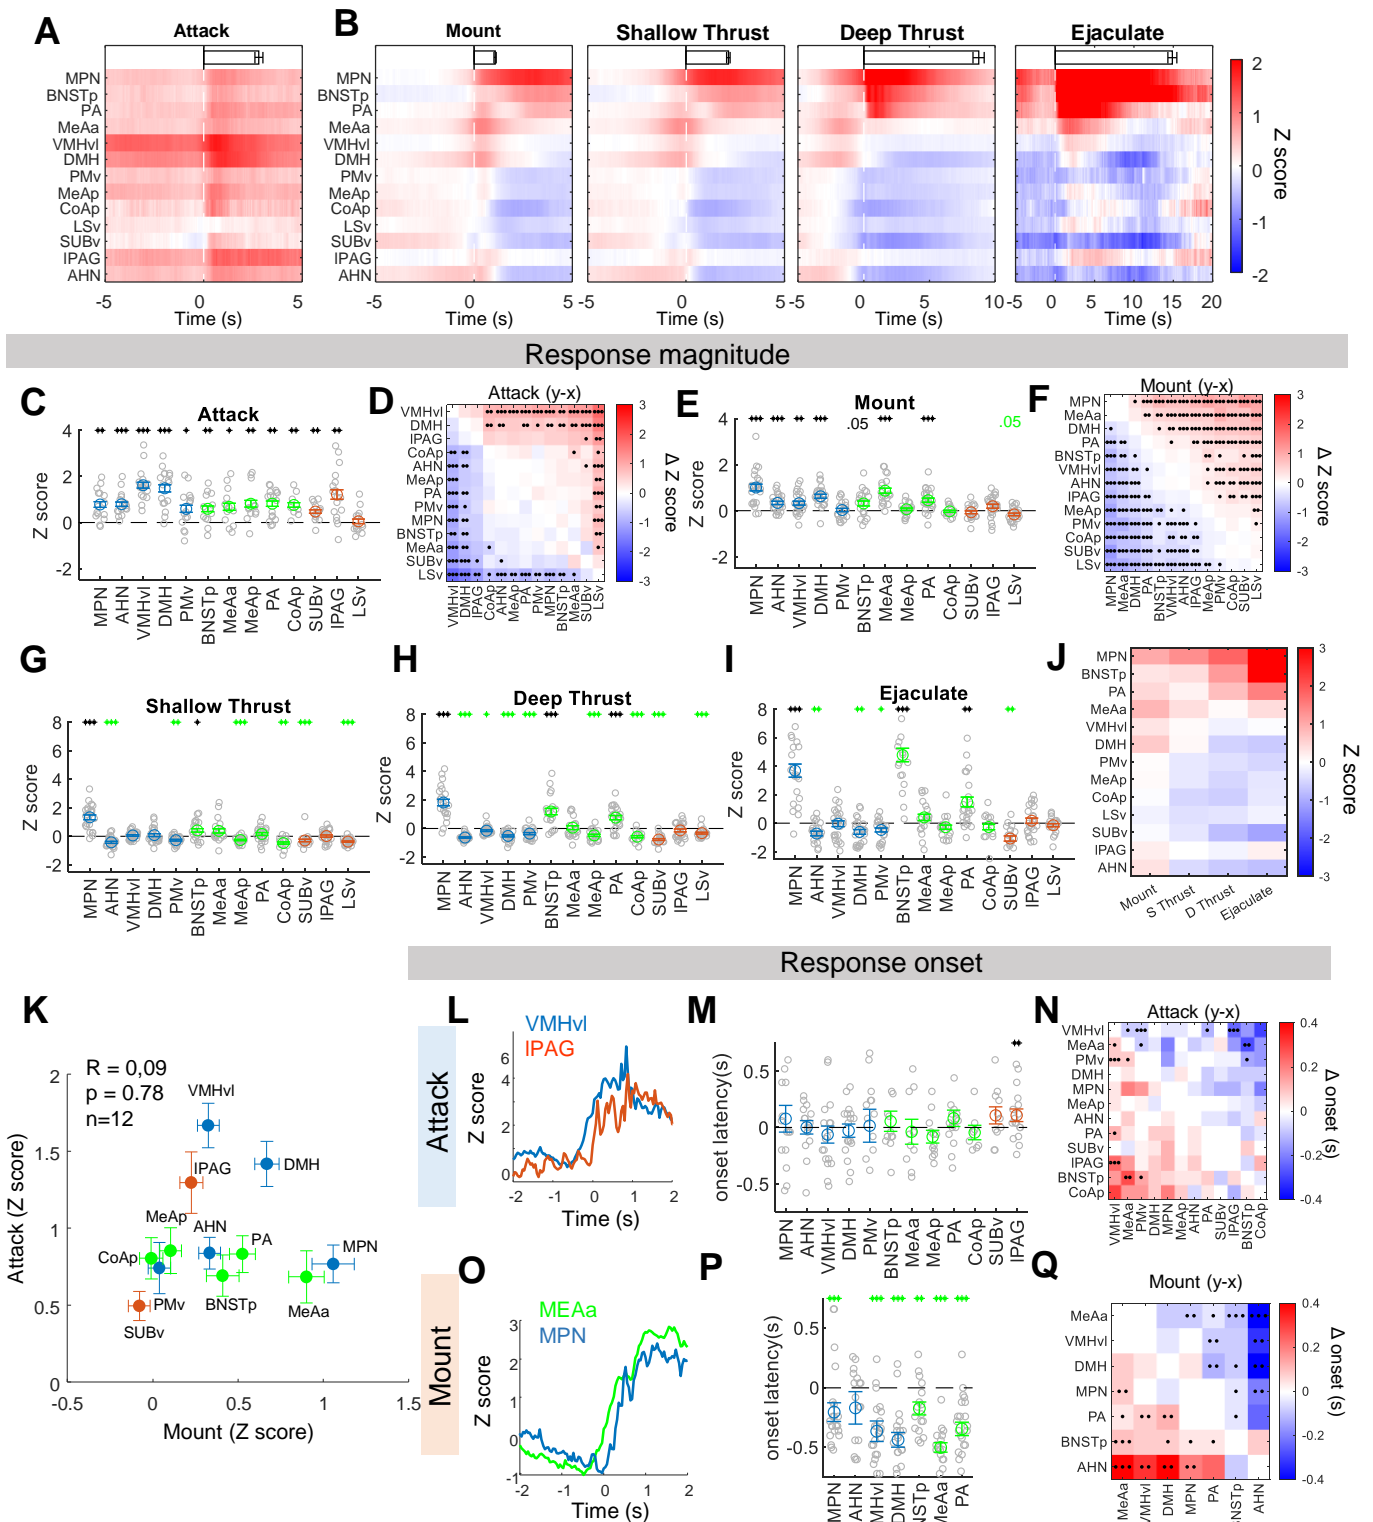

**Figure 4: Distinct activation patterns in the expanded SBN during male aggressive and sexual behaviors.**

**A-B.** Heatmaps showing average Z scored  $\Delta F/F$  aligned to attack (**A**) and various phases of sexual behaviors (**B**) across all recorded regions. Horizontal bars indicate the average duration of the behavior episodes (mean  $\pm$  SEM).

**C and E.** Average Z scored  $\Delta F/F$  during attack (**C**) and mount (**E**). n = 8-24 animals.

**D and F.** Heatmap showing difference in average Z scored  $\Delta F/F$  during attack (**D**) and mount (**F**) between each pair of regions. n = 11-55 sessions.

**G-I.** Average Z scored  $\Delta F/F$  during shallow thrust (**G**), deep thrust (**H**), and ejaculation (**I**). n = 12-25 animals.

**J.** Heat map showing the average Z scored  $\Delta F/F$  during various stages of male sexual behaviors across regions.

**K.** Scatter plot showing that response magnitude during attack and mount is not correlated. n=12 regions that are responsive during at least one behavior.

**L and O.** Representative simultaneously recorded  $Ca^{2+}$  traces of VMHvl and IPAG Esr1 cells during attack (**L**) and MeAa and MPN Esr1 cells during mount (**O**).

**M and P.** The response latency during attack (**M**) and mount (**P**) of responsive regions. n = 8-23 animals.

**N and Q.** Heatmap showing the difference in average response onset during attack (**N**) and mount (**Q**) between each pair of regions. n = 23-260 trials.

All error bars and shades of PETHs: Mean  $\pm$  SEM; Each gray circle in **C, E, G, H, I, M, and P** represents one animal.

**C, E, G-I, M, P:** one sample t-test (if pass Lilliefors normality test) or Wilcoxon signed-rank test (if not pass Lilliefors normality test) and p values are adjusted with Benjamini Hochberg procedure for controlling the false discovery rate. **D, F, N, and Q:** paired t-test (if pass Lilliefors normality test) or Wilcoxon signed-rank test (if not pass Lilliefors normality test) and p values are adjusted with Benjamini Hochberg procedure for controlling the false discovery rate. \*p<0.05; \*\*p<0.01; \*\*\*p<0.001. Black and green indicate the average values above or below 0, respectively. I: Pearson's cross-correlation. See Table S1 for raw data and detailed statistics.

# Figure 5

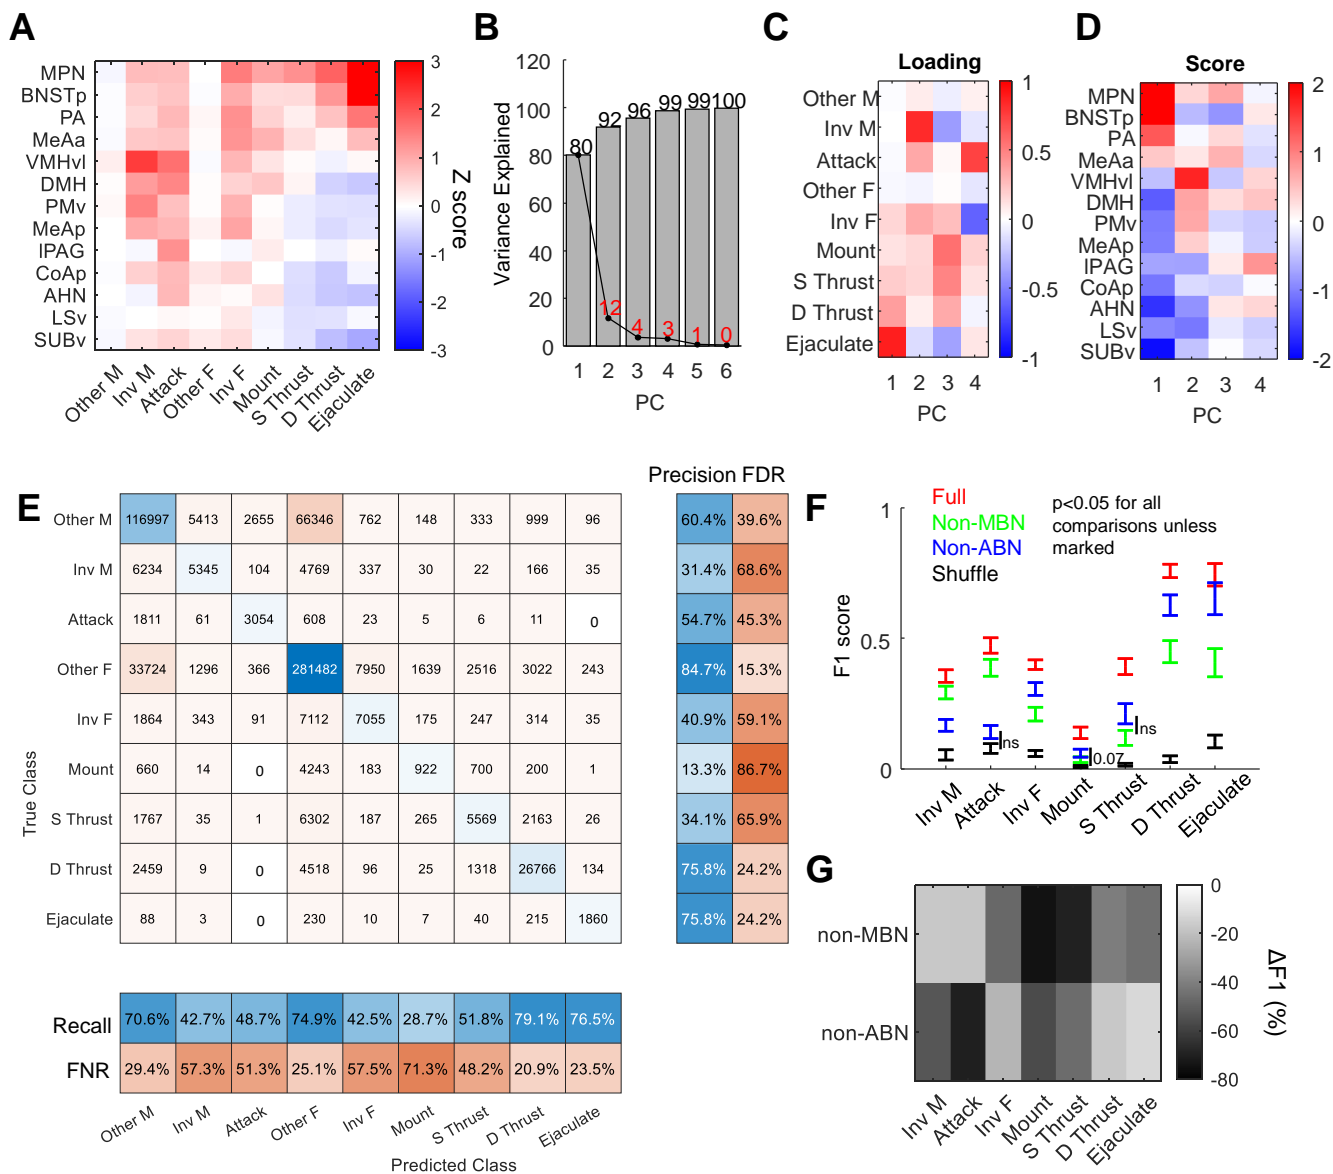

● Mating-biased Network (MBN)

● Aggression-biased Network (ABN)

● Other regions in this study

**Figure 5. Activities in MBN and ABN predict male sexual and aggressive behaviors, respectively.**

**A.** Heat map showing the average Z scored  $\Delta F/F$  during male- and female-directed social behaviors across regions in male mice. “Other M” and “Other F” refer to periods when the male or female intruder is present but no specific social behavior is annotated. Inv: investigate; S Thrust: shallow thrust; D Thrust: deep thrust.

**B.** The variance in responses during different behaviors explained by the first 6 PCs.

**C.** The loading (coefficient) of the first 4 PCs.

**D.** The scores of the first 4 PCs for each region.

**E.** Confusion matrix shows the number of frames that are correctly and incorrectly classified for each behavior across all sessions. Left columns show the precision (blue) and false discovery rate (FDR, orange). Bottom rows show the recall (blue) and false negative rate (FNR, orange).

**F.** F1 scores for various behaviors computed using full models that includes data from all recording regions, non-MBN models, non-ABN models, and models built with shuffled data. Error bar: mean  $\pm$  SEM. Paired t-test (if pass Lilliefors normality test) or Wilcoxon signed-rank test (if not pass Lilliefors normality test). All comparisons with p values < 0.05 unless marked. ns: not significant. n = 17-24 animals.

**G.** Heat map showing the averaged decrease in F1 score when using non-MBN and non-ABN models compared to the full model.

See Table S1 for raw data and detailed statistics.

# Figure 6

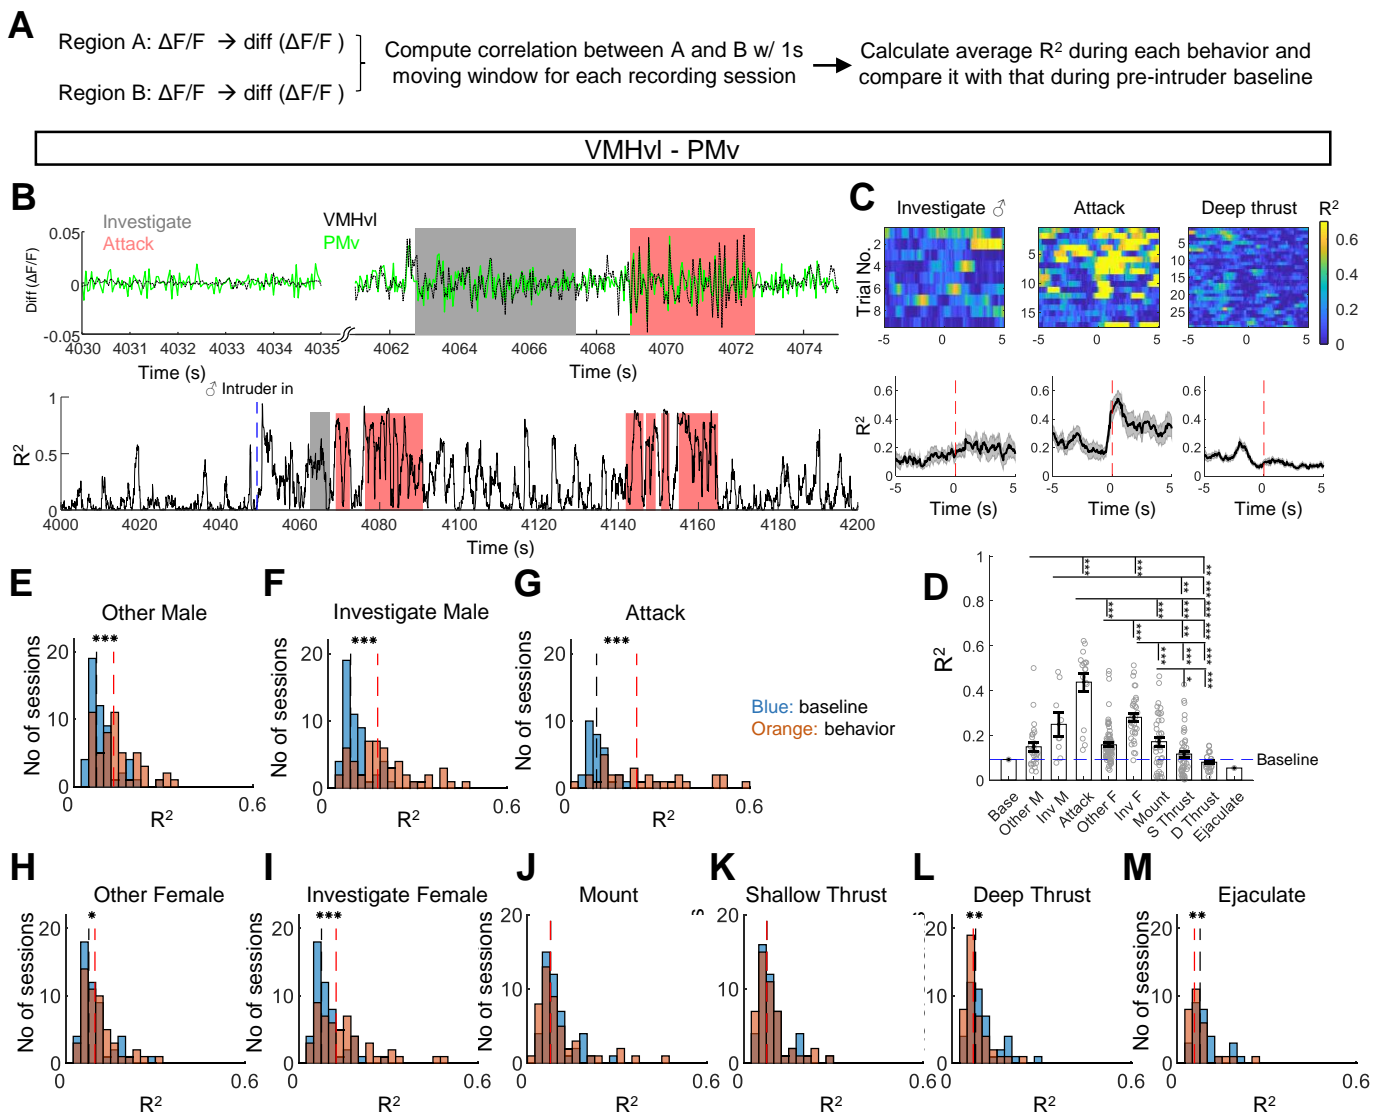

**Figure 6. Changes in functional connectivity between VMHvl and PMv during various social behaviors.**

**A.** The procedure to calculate the coefficient of determination ( $R^2$ ) between a pair of regions during various behaviors.

**B.** Differential Z scored  $\Delta F/F$  traces of VMHvl (black) and PMv (green) (top) and their moment-to-moment  $R^2$  (bottom) from a representative recording session. Shades indicate behavior episodes.

**C.** Heatmaps (top) and PETHs (bottom) aligned to the onset of male investigation (left), attack (middle), and deep thrust (right). It is from the same recording session, as shown in B.

**D.** Average  $R^2$  between VMHvl and PMv during various behaviors in the recording session shown in **B** and **C**.  $n = 1-86$  trials. “Base” refers to pre-intruder period. “Other M” and “Other F” refer to periods when the male or female intruder is present but no specific social behavior is annotated. Inv: investigate; S Thrust: shallow thrust; D Thrust: deep thrust. Kruskal-Wallis test followed by Benjamini Hochberg procedure for controlling the false discovery rate.

**E-M.** Histograms show the distribution of  $R^2$  at the pre-intruder baseline (orange) and during specific behavior epochs (blue). Black and red dashed lines indicate the median values of the  $R^2$  during the baseline and behavior periods. Baseline and behavior sessions are matched. Paired t-test (if pass Lilliefors normality test) or Wilcoxon signed-rank test (if not pass Lilliefors normality test).

Error bars and shades of PETHs: Mean  $\pm$  SEM. \* $p < 0.05$ ; \*\* $p < 0.01$ ; \*\*\* $p < 0.001$ . See Table S1 for raw data and detailed statistics.

# Figure 7

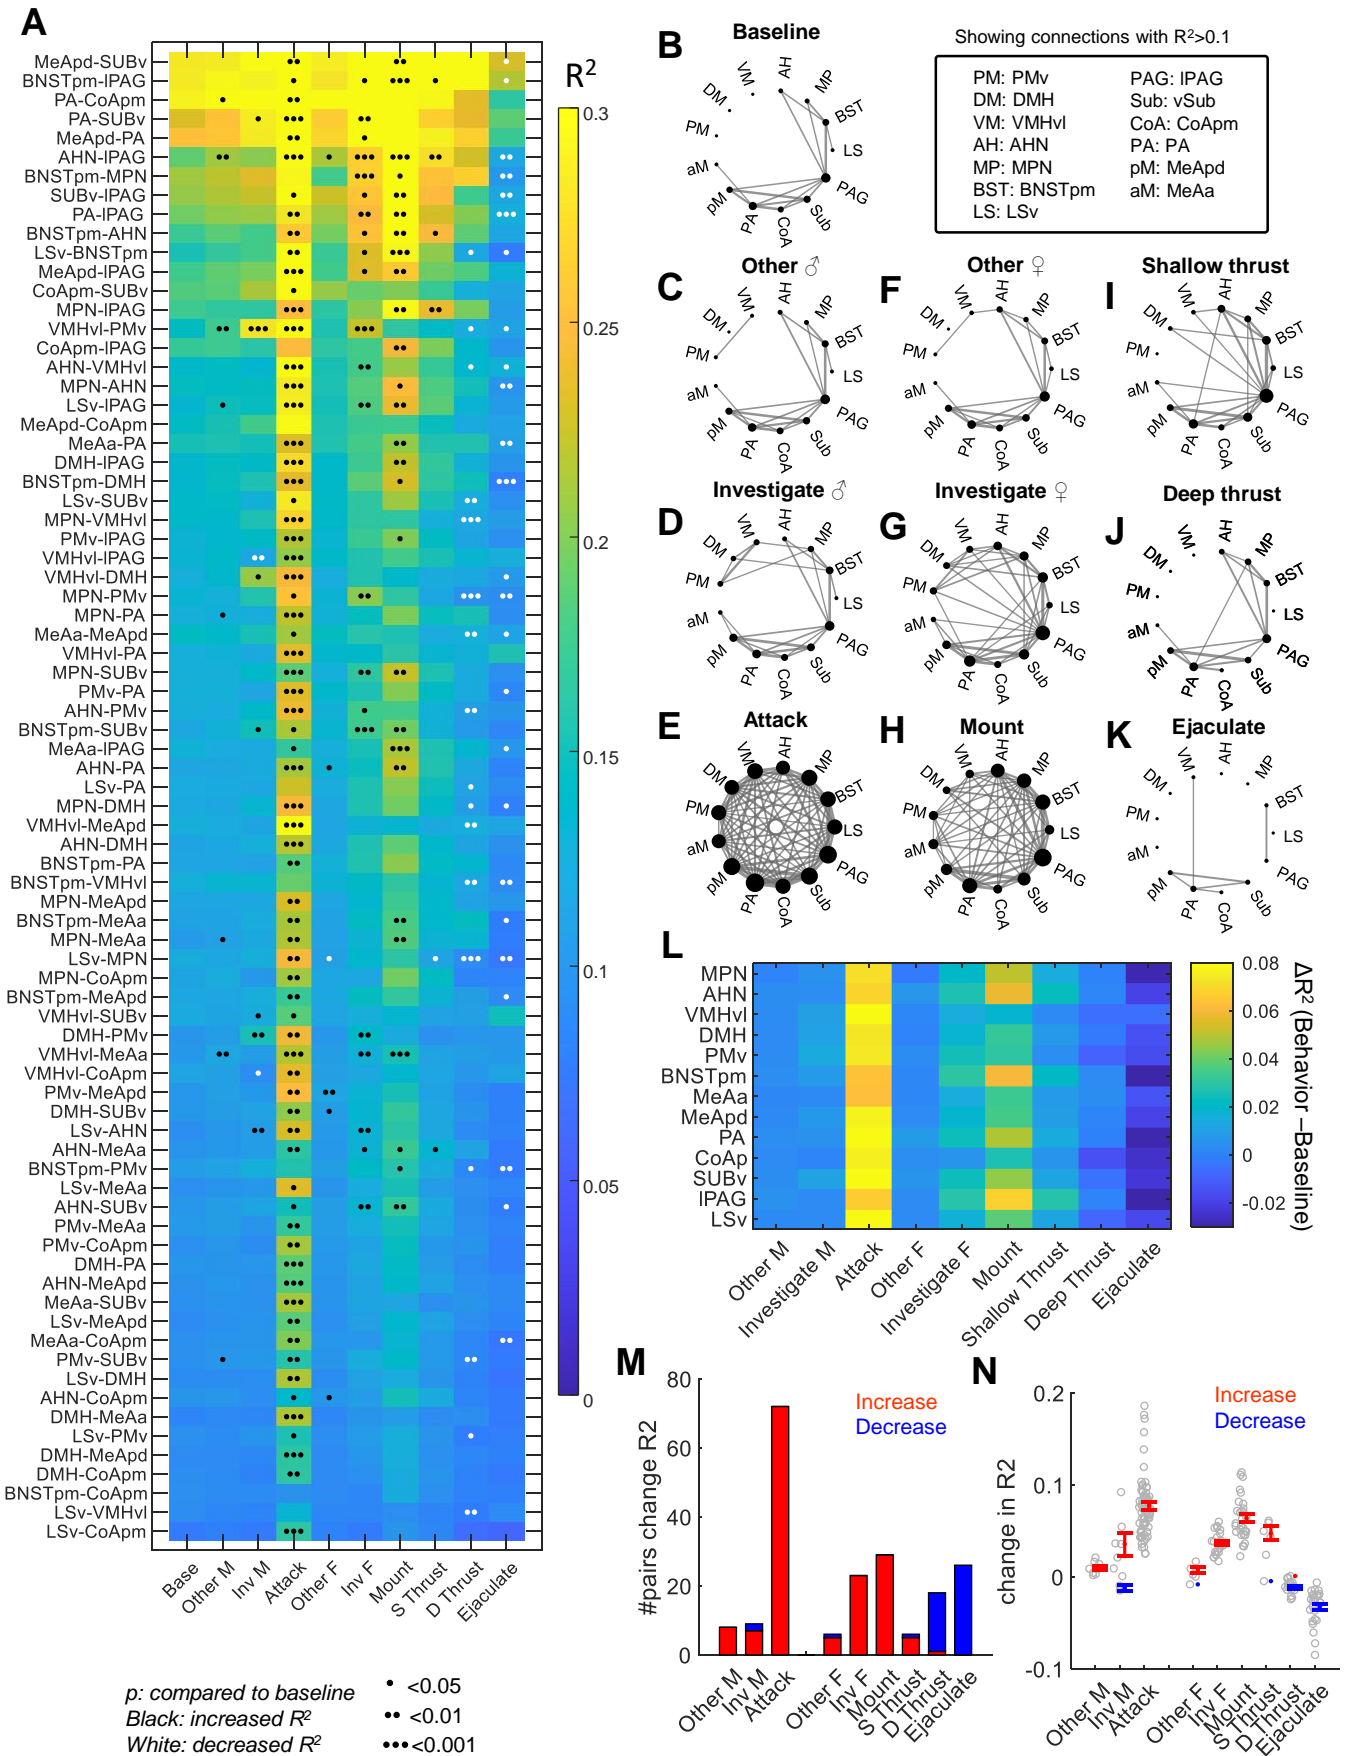

**Figure 7. Changes in functional connectivity across the expanded SBN during social behaviors.**

**A.** Heat map shows the average  $R^2$  of all pairs of regions during various behavior epochs and its comparison to the  $R^2$  values during the baseline period. “Base” refers to pre-intruder period. “Other M” and “Other F” refer to periods when the male or female intruder is present but no specific social behavior is annotated. Inv: investigate; S Thrust: shallow thrust; D Thrust: deep thrust. Paired t-test (if pass Lilliefors normality test) or Wilcoxon signed-rank test (if not pass Lilliefors normality test). P values are adjusted using with Benjamini Hochberg procedure for controlling the false discovery rate. \* $p < 0.05$ ; \*\* $p < 0.01$ ; \*\*\* $p < 0.001$ . Black and white indicate a significant increase or decrease from the baseline, respectively.

**B-K.** Graph plots showing the strength of functional connectivity ( $R^2$ ) among different regions during various social behavior epochs. Only connections with  $R^2 > 0.1$  are shown. The size of a node reflects its overall connection strength.

**L.** Heat map shows averaged change of  $R^2$  of each region with all other regions during various behaviors.

**M.** the number of pairs of regions that show significantly increased  $R^2$  (red) or decreased  $R^2$  (blue) from the pre-intruder baseline.

**N.** Change in  $R^2$  values from the pre-intruder baseline for significantly changed connections. Red and blue show the mean  $\pm$  SEM of significantly increased and decreased connections during each behavior.  $n = 0-72$  pairs of regions.

See Table S1 for raw data and detailed statistics.
